# Supplementary material for: Obesity-linked suppression of membrane-bound O-acyltransferase 7 (MBOAT7) drives non-alcoholic fatty liver disease
Source: eLife journal article supplement (doi:10.7554/elife.49882), 2019-10-17
Supplement: supp [file elife-49882-supp-v1.zip]

Archive with 16 entries (16 files):
- elife_poa_e49882_Figure_6_figure_supplement_4.jpg
- elife_poa_e49882_FIgure_6_figure_supplement_6.jpg
- elife_poa_e49882_Figure_2_figure_supplement_4.jpg
- elife_poa_e49882_Figure_2_figure_supplement_5.jpg
- elife_poa_e49882_Figure_2_figure_supplement_3.jpg
- elife_poa_e49882_Figure_6_figure_supplement_5.jpg
- elife_poa_e49882_Figure_2_figure_supplement_1.jpg
- elife_poa_e49882_Figure_2_figure_supplement_2.jpg
- elife_poa_e49882_Figure_7_figure_supplement_1.jpg
- elife_poa_e49882_FIgure_6_figure_supplement_2.jpg
- elife_poa_e49882_Figure_8_figure_supplement_2.jpg
- elife_poa_e49882_Transparent_Reporting_File.pdf
- elife_poa_e49882_Figure_3_figure_supplement_1.jpg
- elife_poa_e49882_FIgure_6_figure_supplement_3.jpg
- elife_poa_e49882_Figure_8_figure_supplement_1.jpg
- elife_poa_e49882_Figure_6_figure_supplement_1.jpg
