# Supplementary figures and images for: Obesity-linked suppression of membrane-bound O-acyltransferase 7 (MBOAT7) drives non-alcoholic fatty liver disease
Source: eLife journal article supplement (doi:10.7554/elife.49882), 2019-10-17

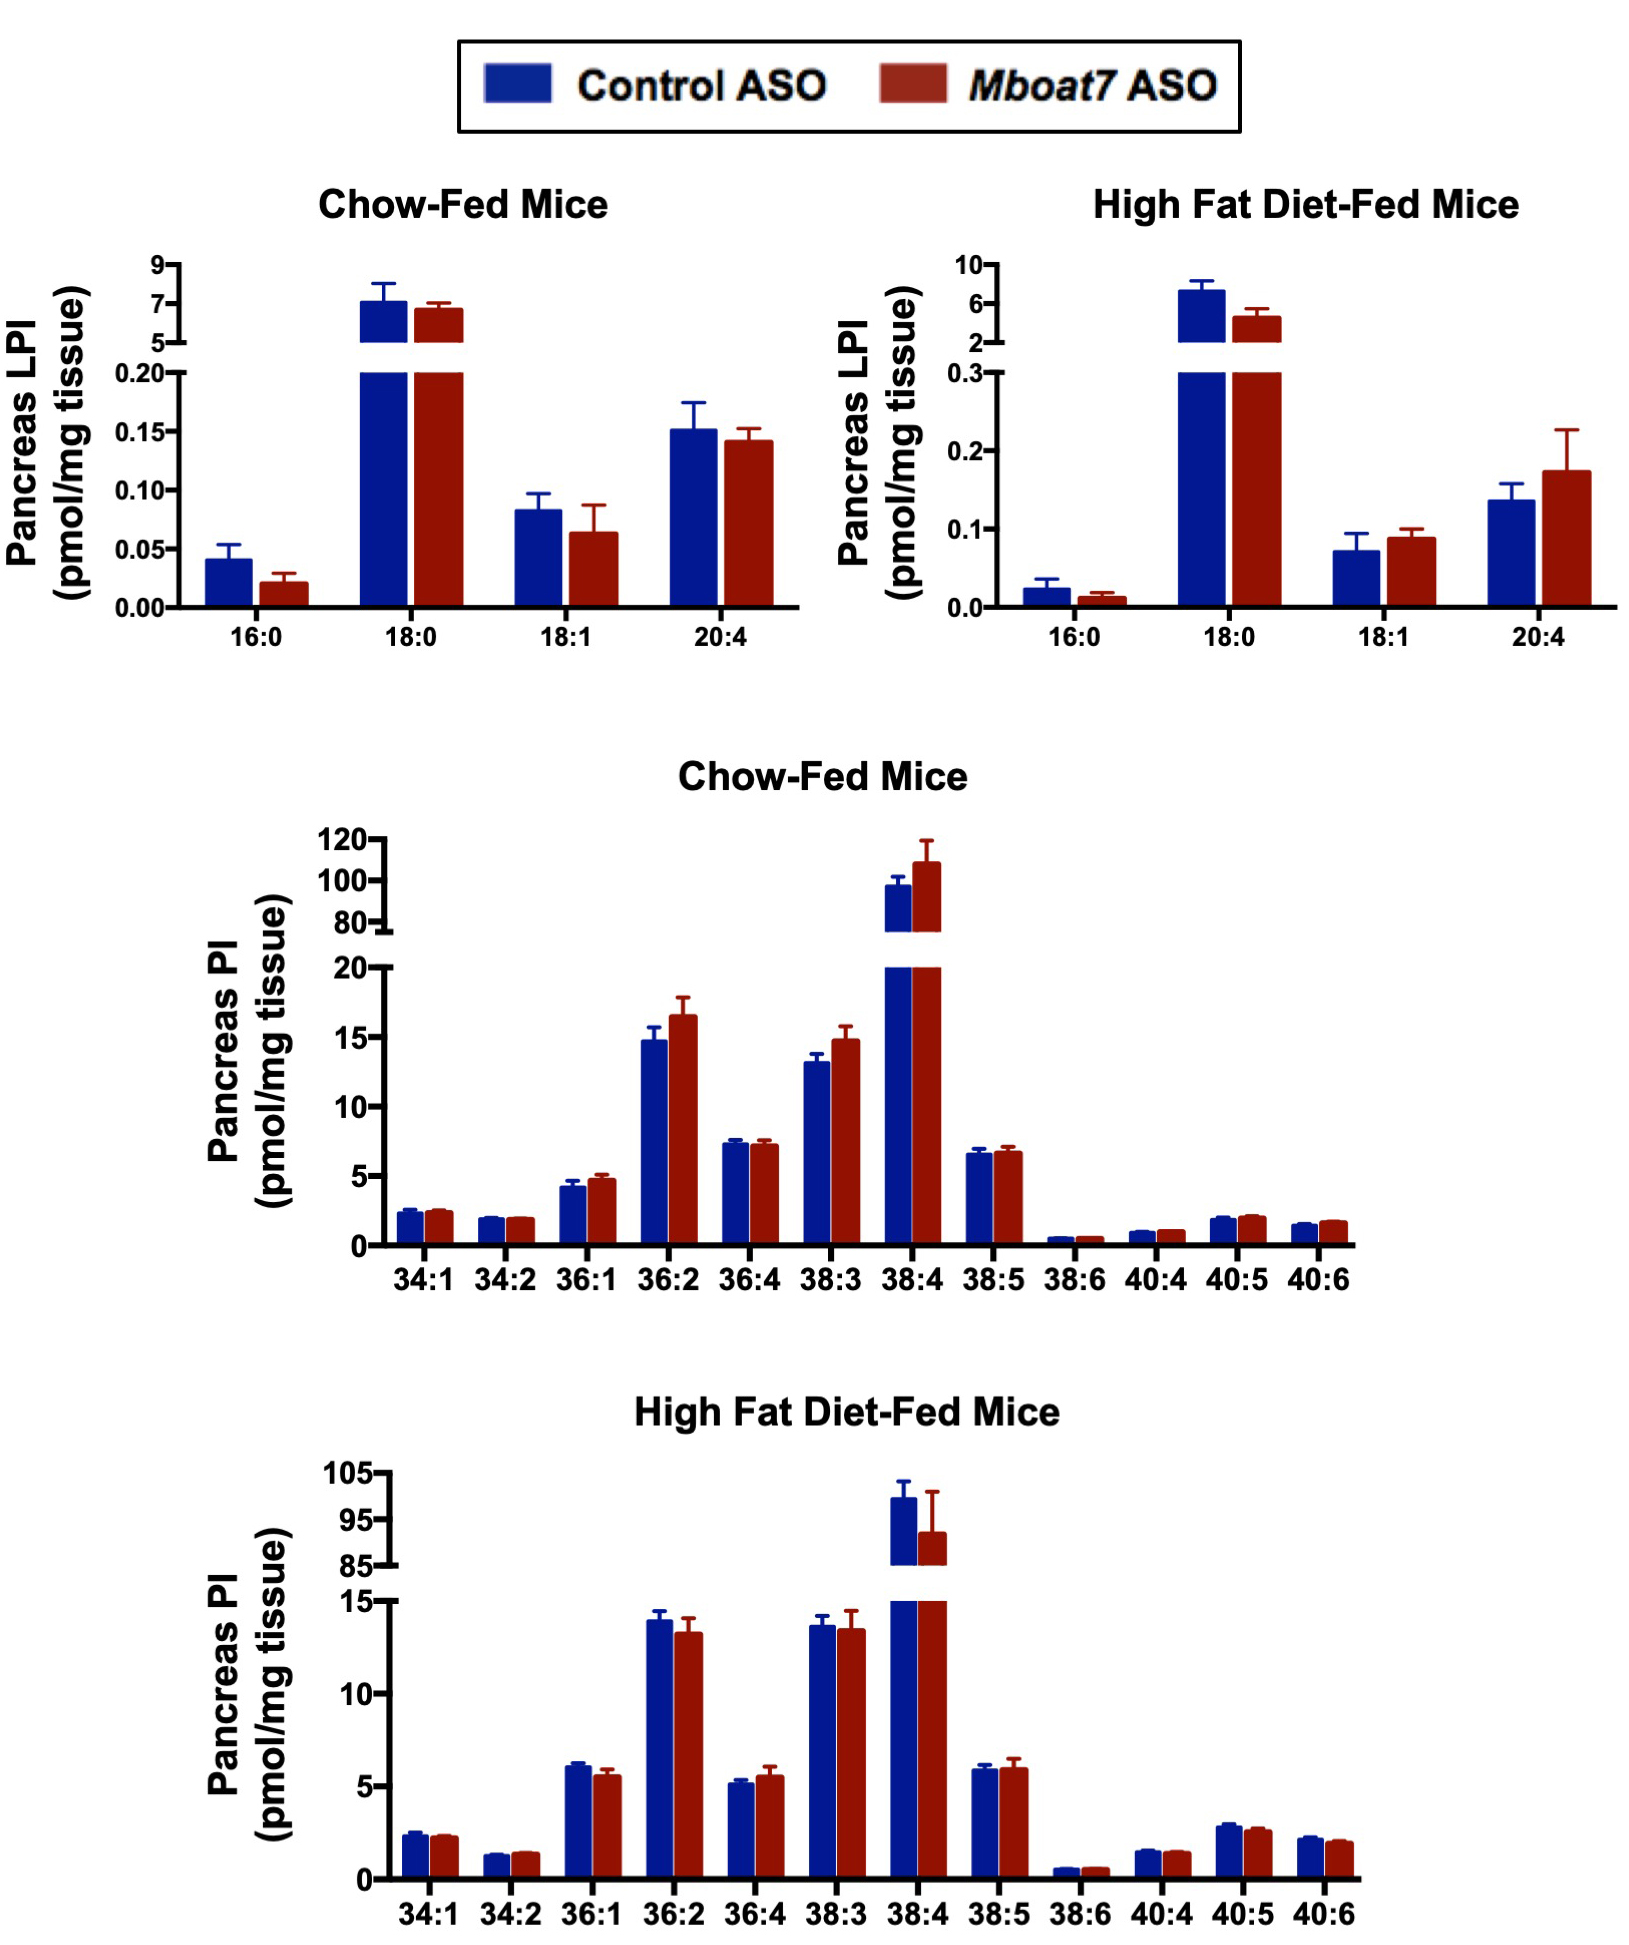

Supplement: supp [file elife-49882-supp-v1.zip › elife_poa_e49882_Figure_6_figure_supplement_4.jpg]

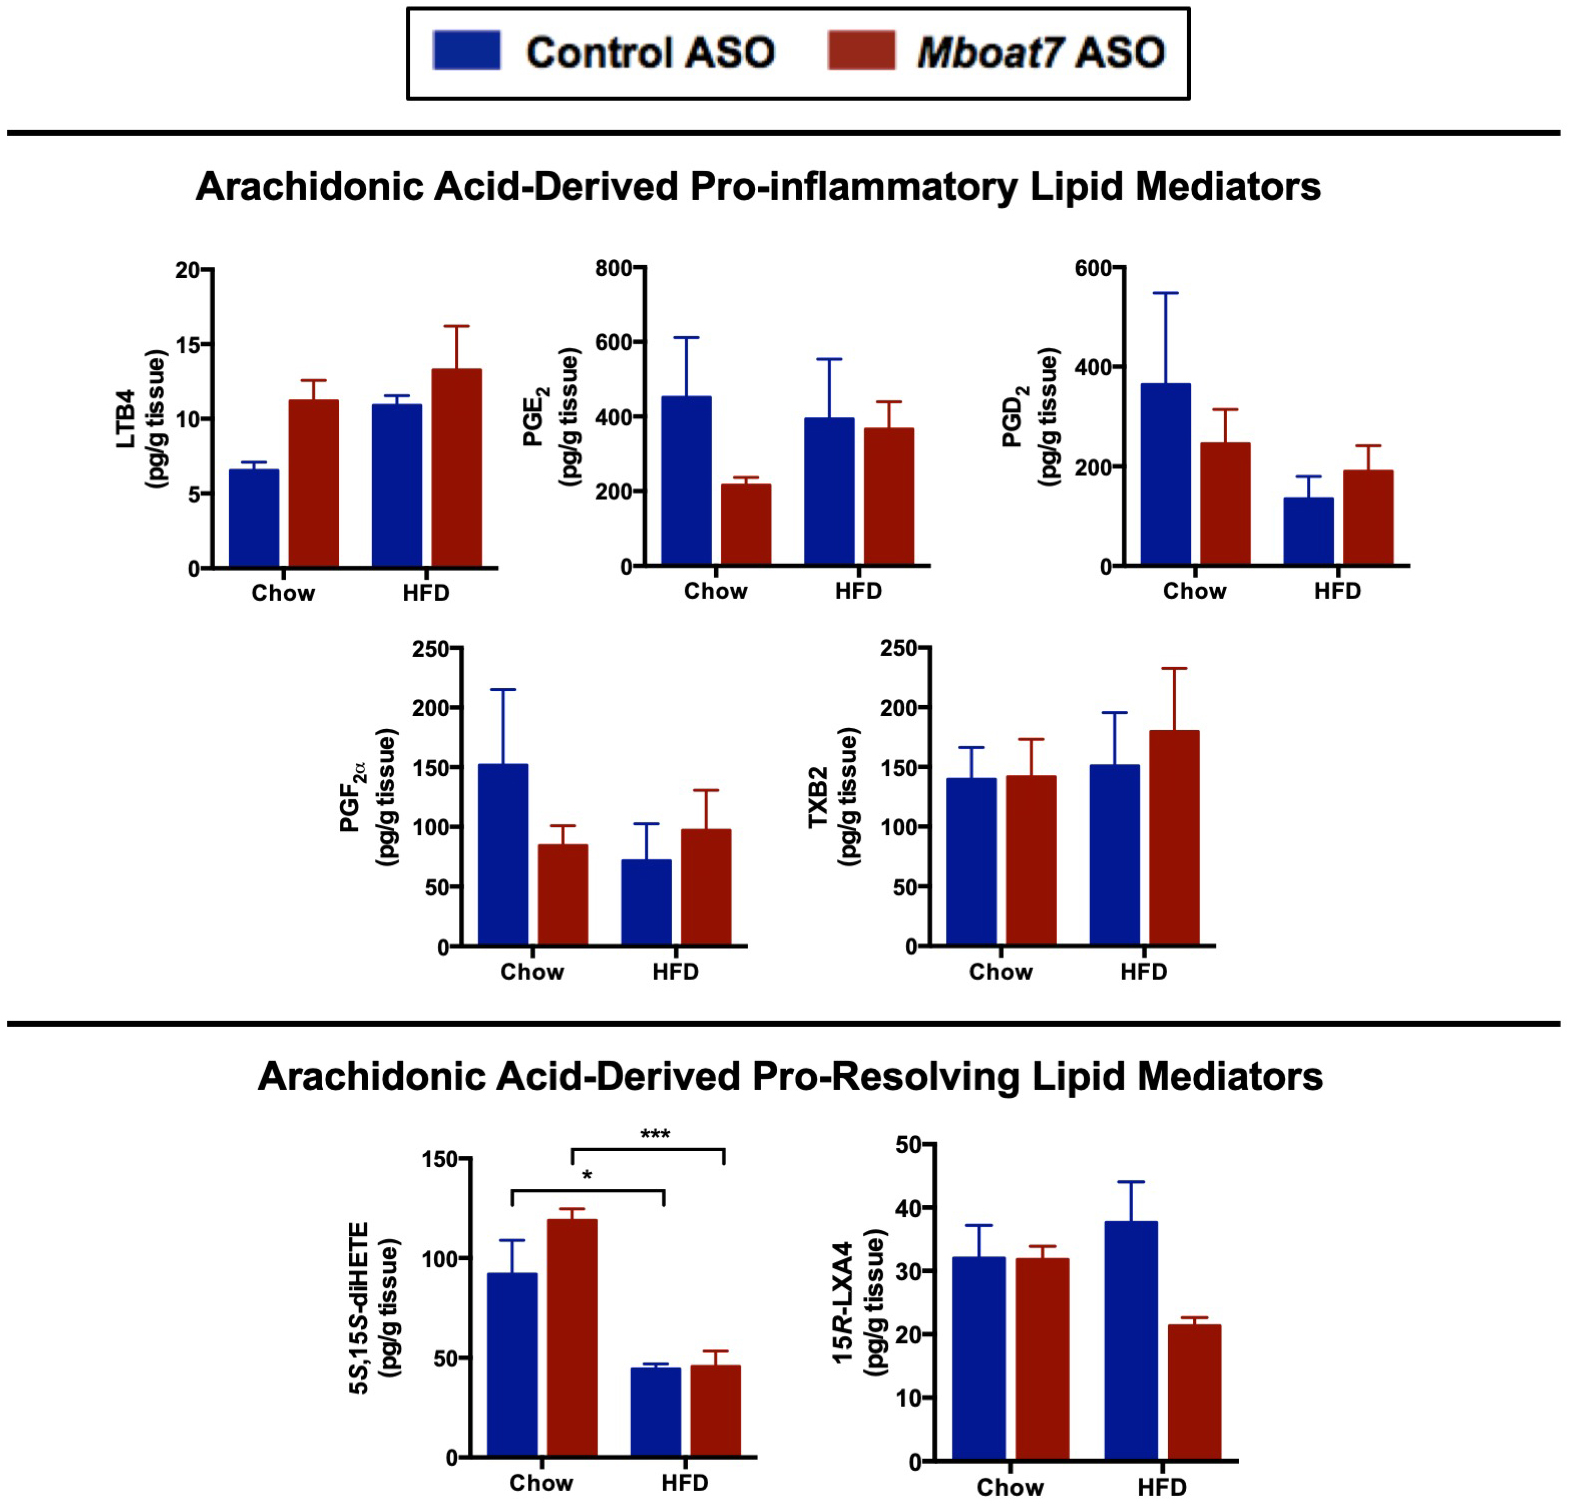

Supplement: supp [file elife-49882-supp-v1.zip › elife_poa_e49882_FIgure_6_figure_supplement_6.jpg]

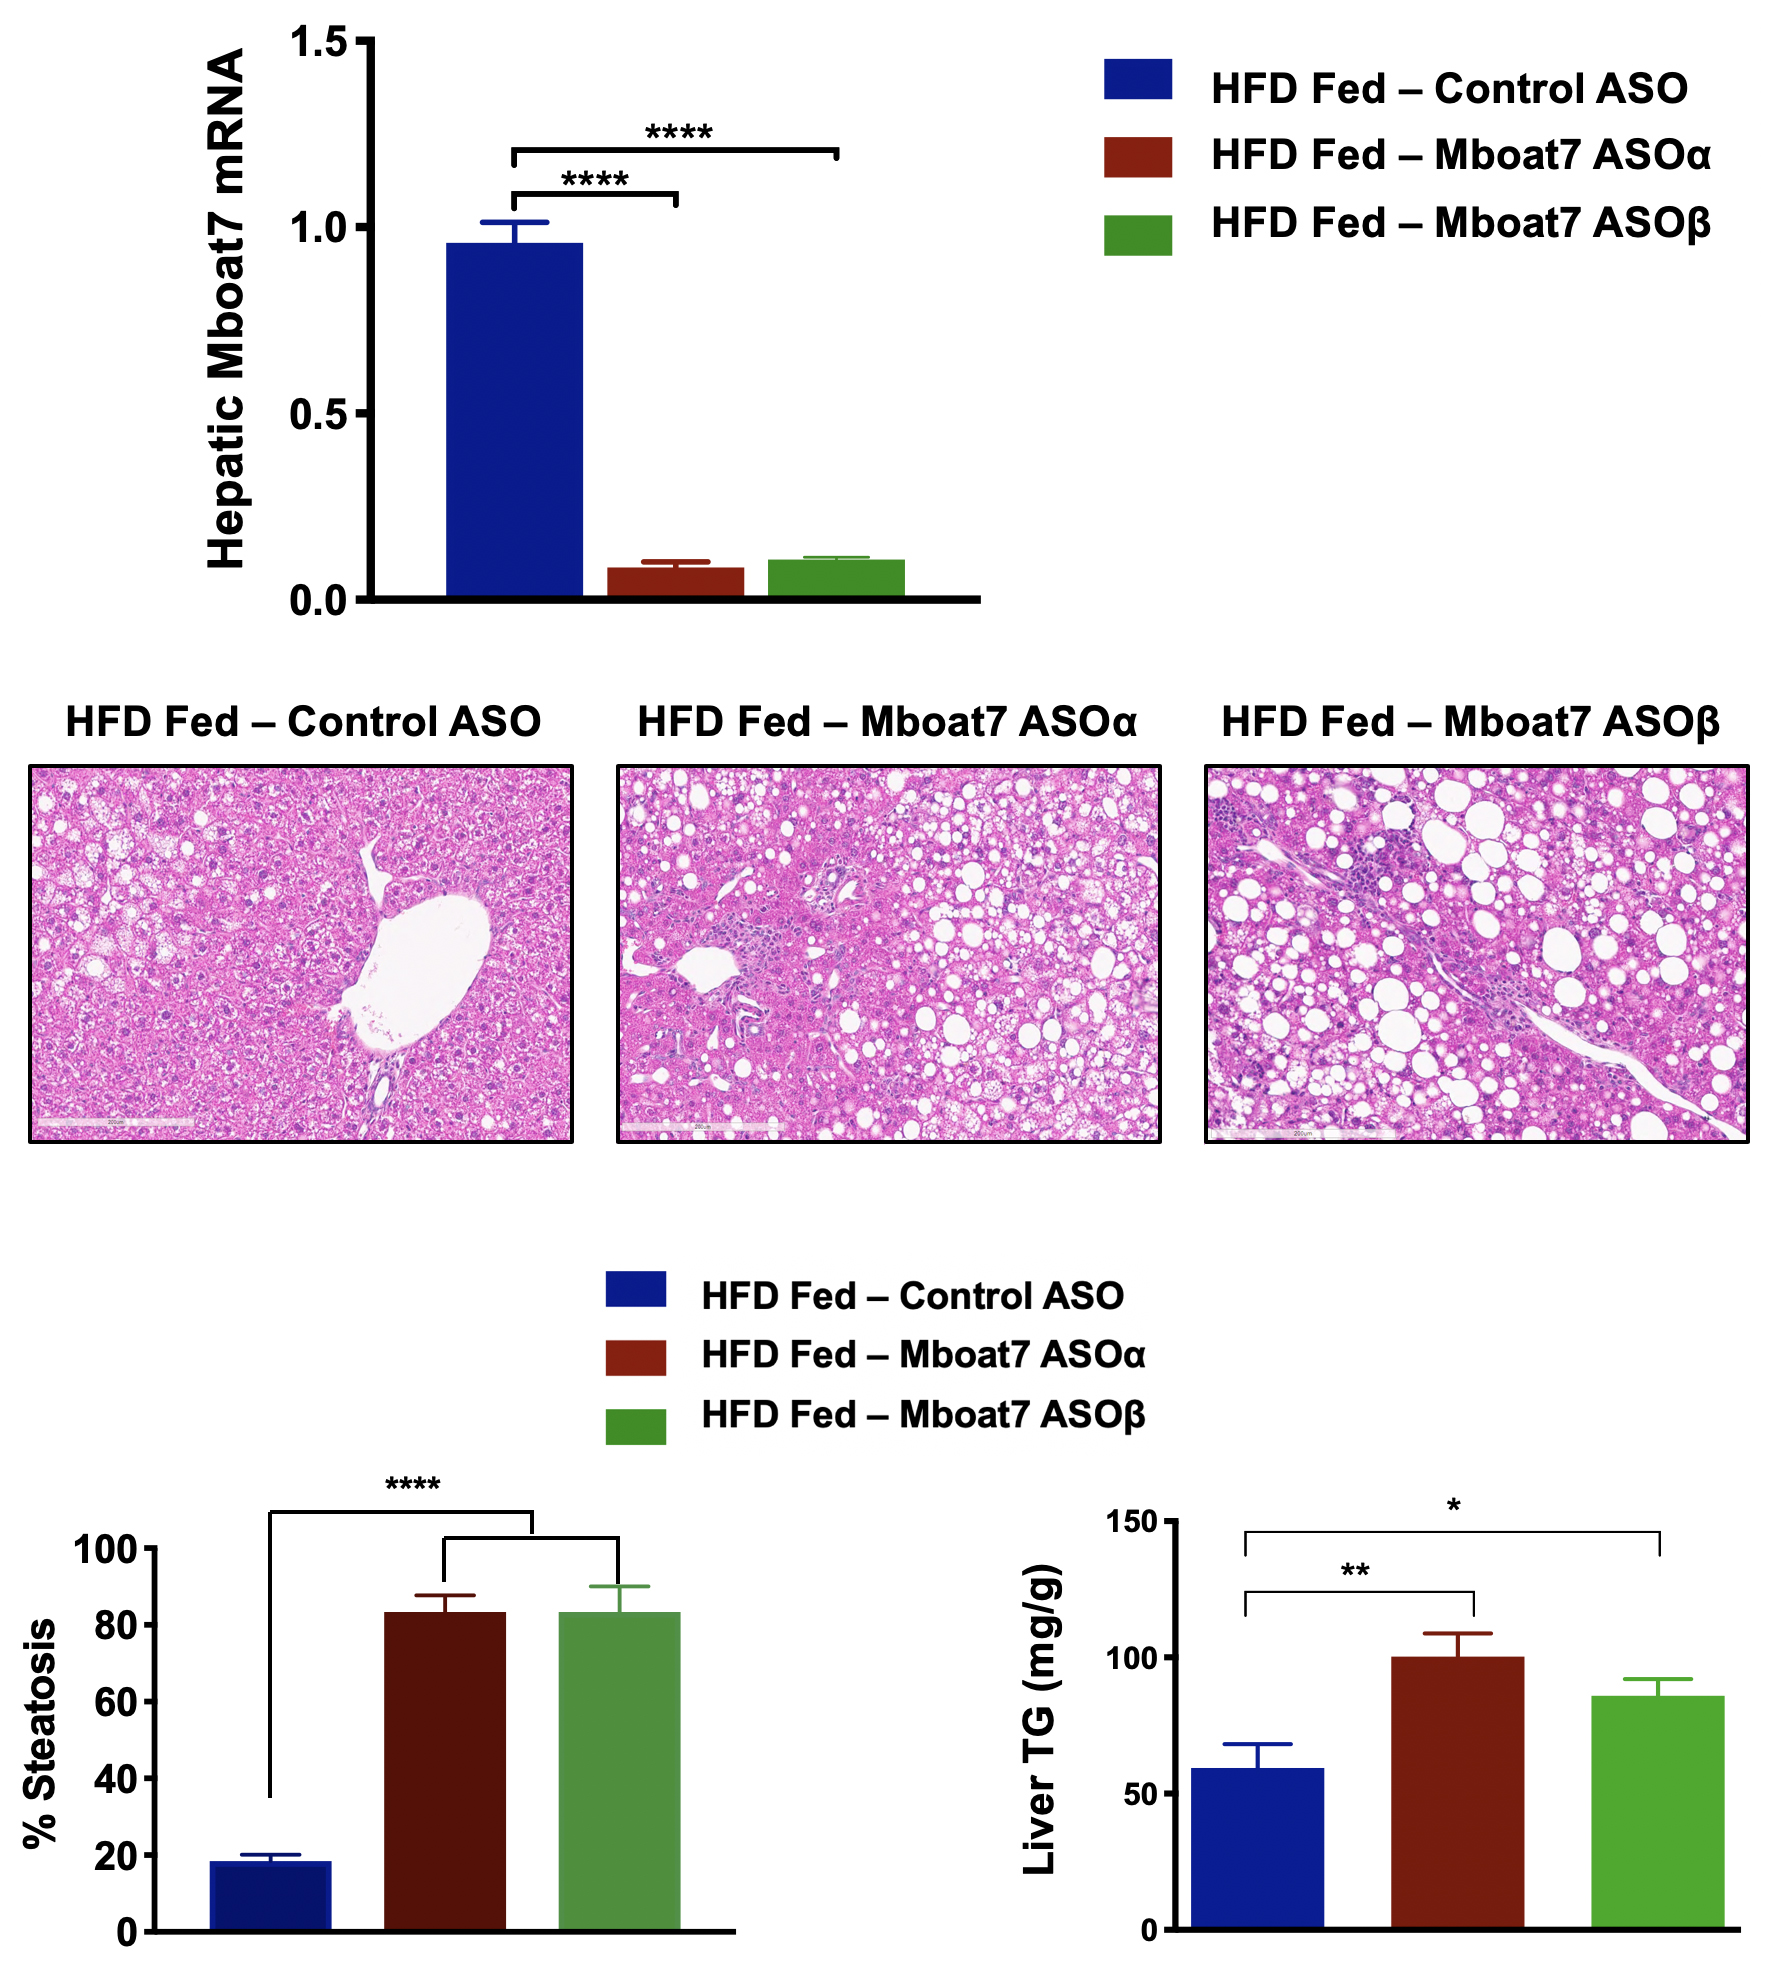

Supplement: supp [file elife-49882-supp-v1.zip › elife_poa_e49882_Figure_2_figure_supplement_4.jpg]

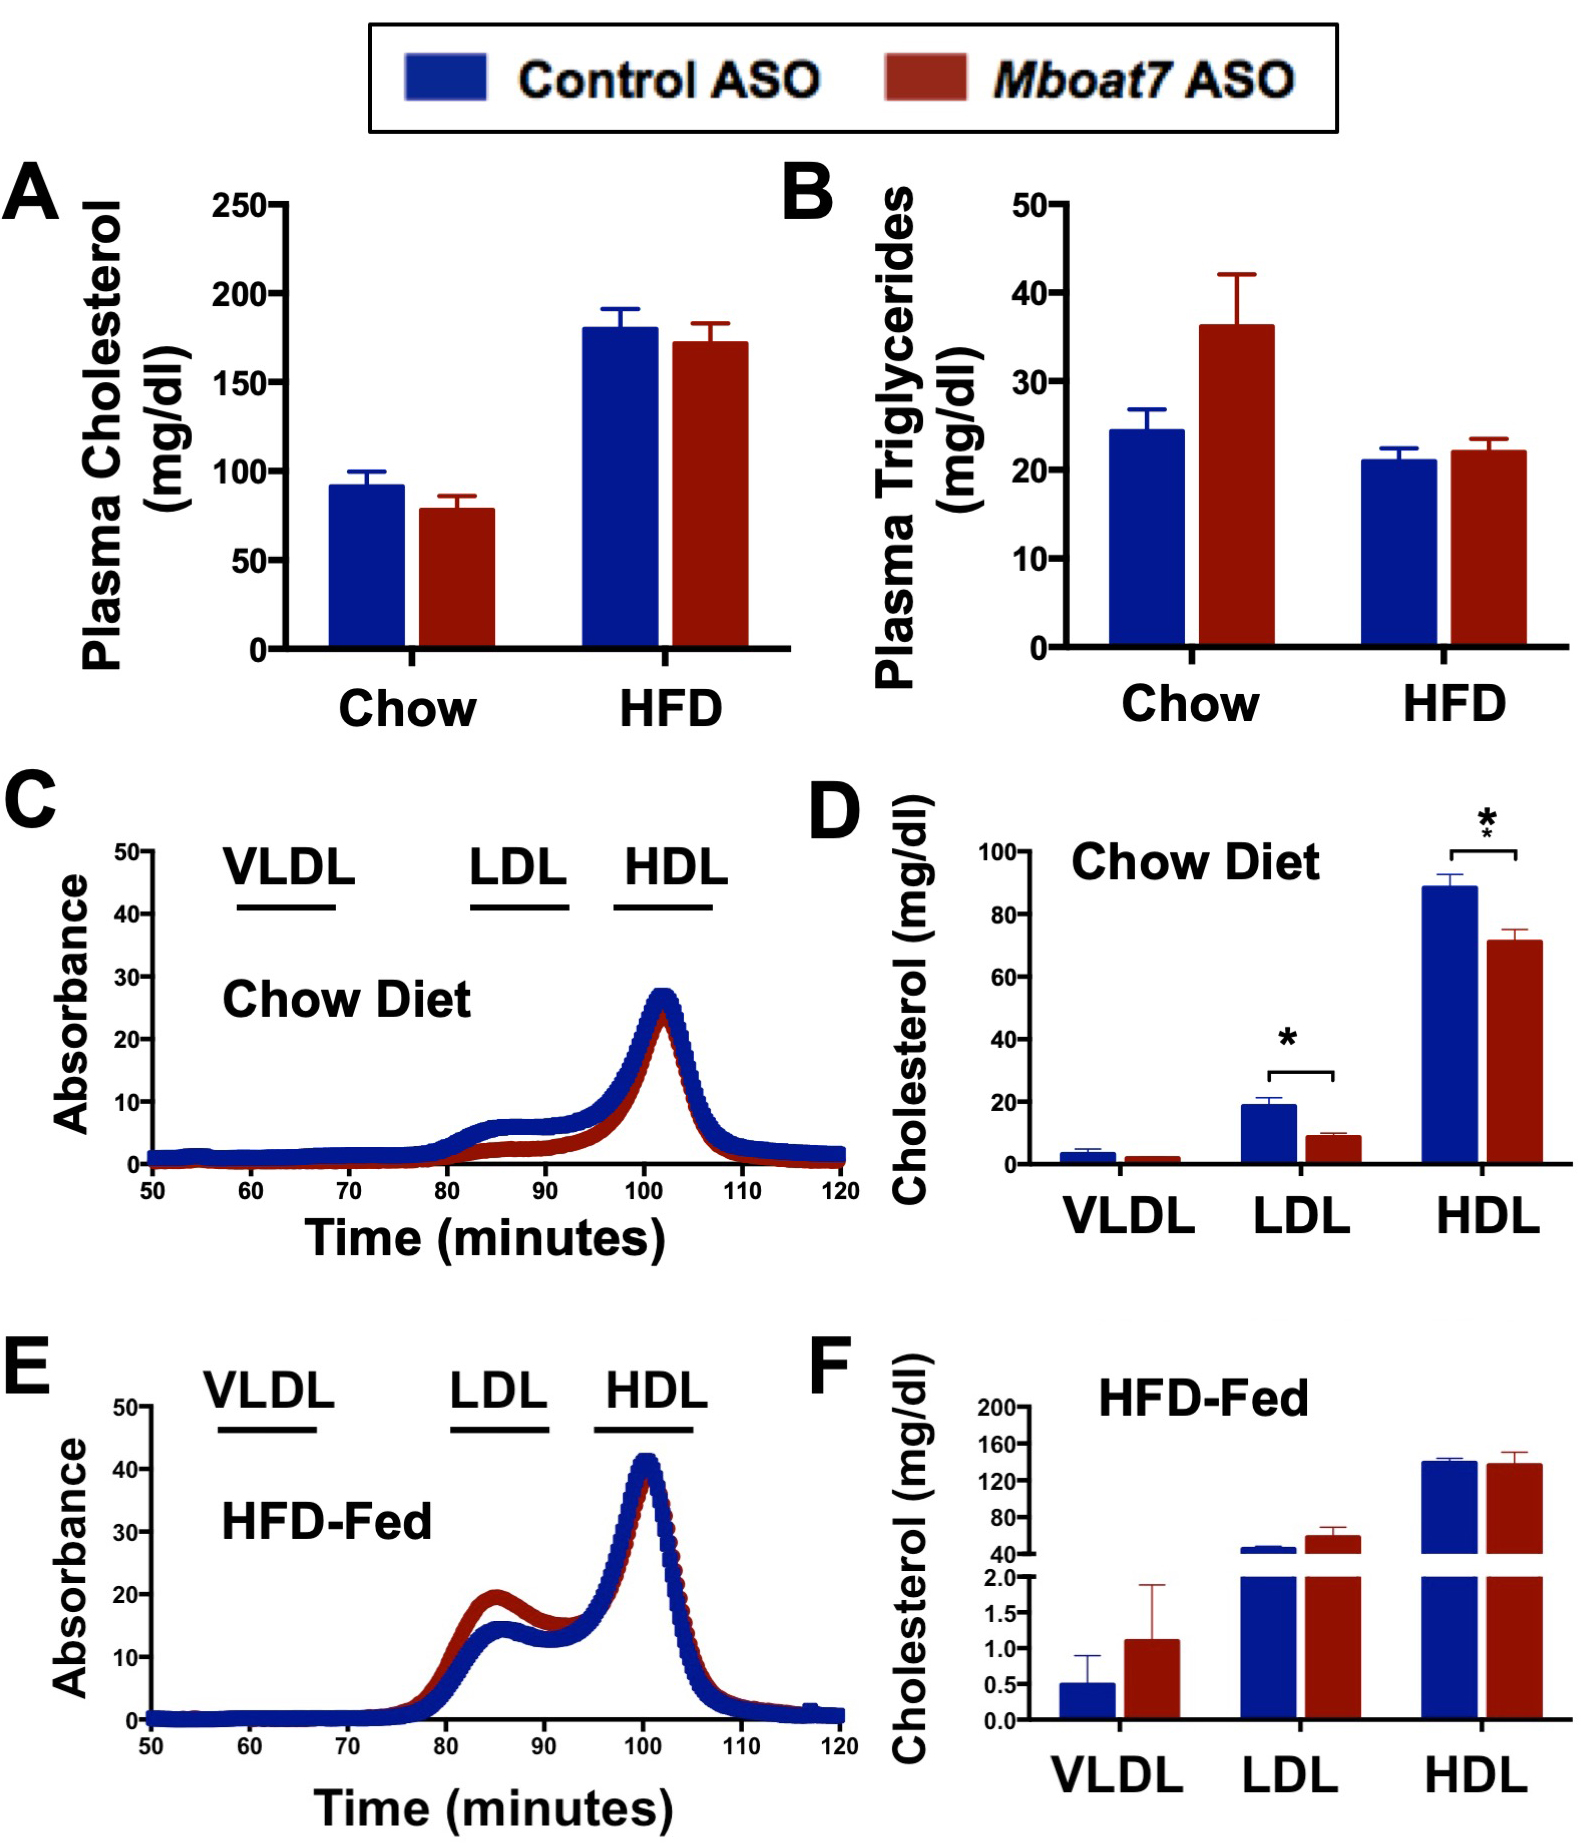

Supplement: supp [file elife-49882-supp-v1.zip › elife_poa_e49882_Figure_2_figure_supplement_5.jpg]

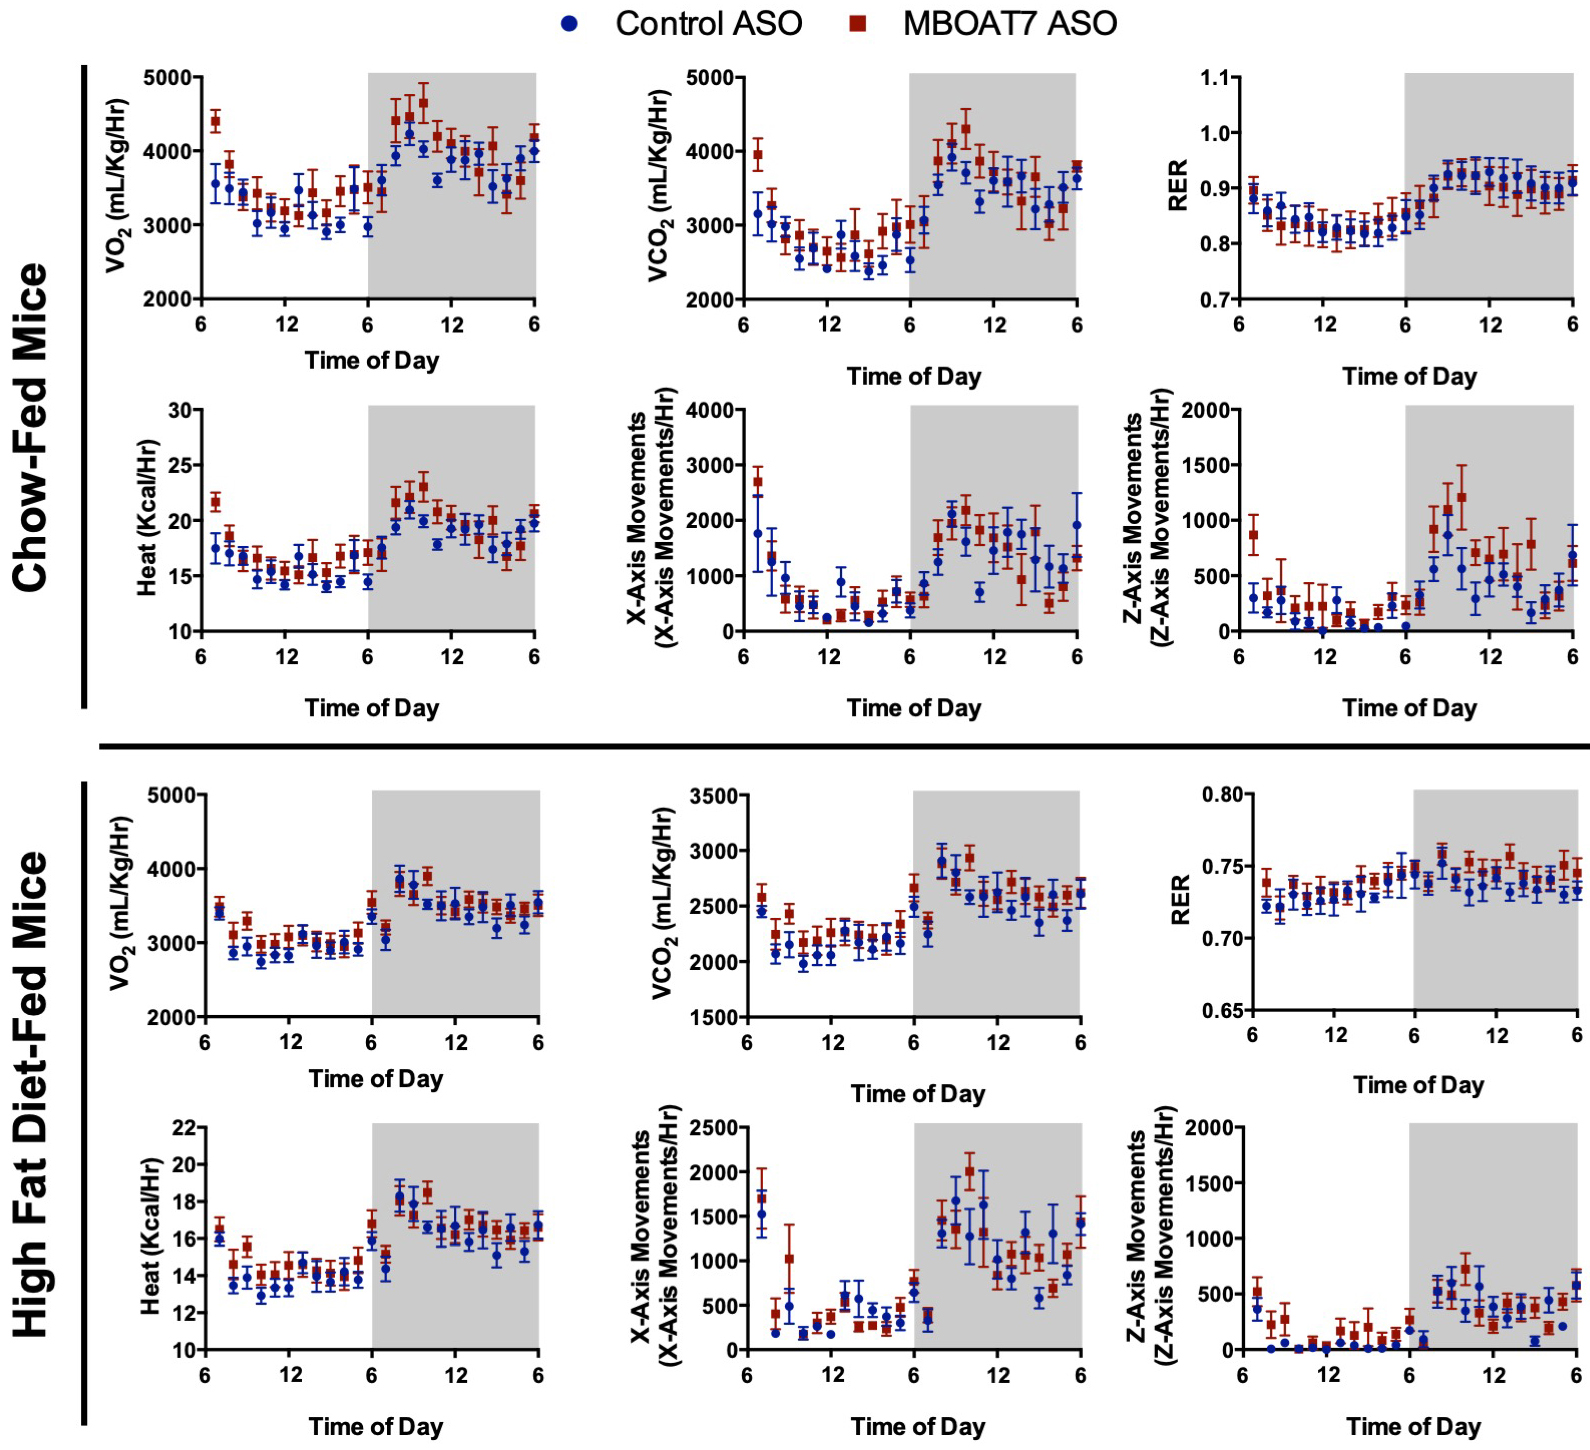

Supplement: supp [file elife-49882-supp-v1.zip › elife_poa_e49882_Figure_2_figure_supplement_3.jpg]

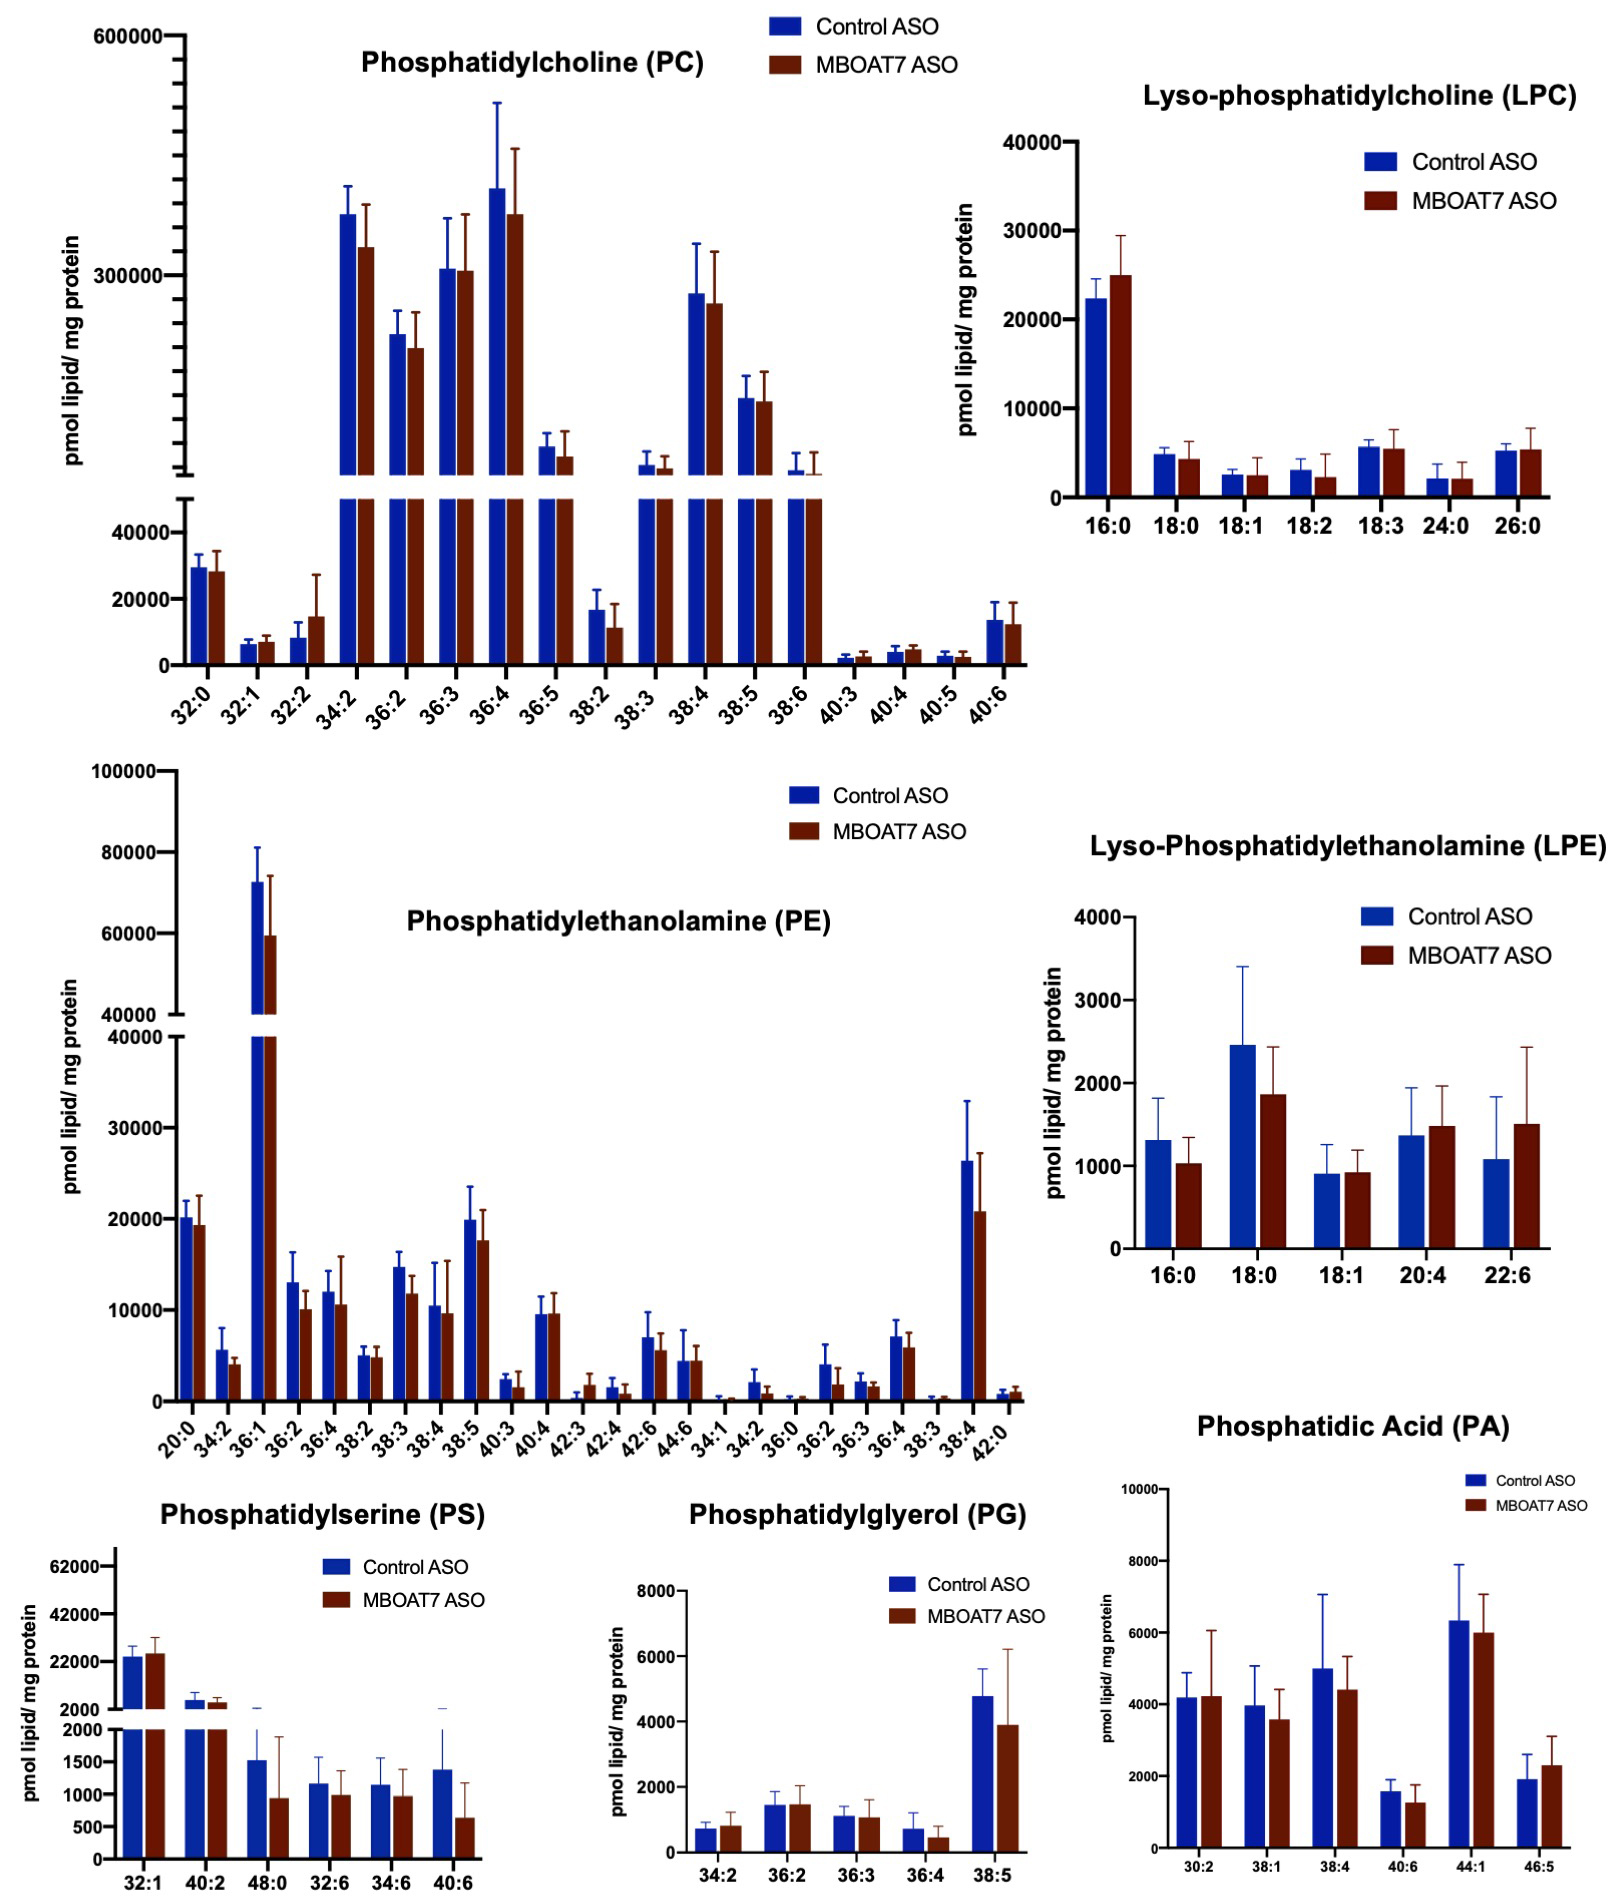

Supplement: supp [file elife-49882-supp-v1.zip › elife_poa_e49882_Figure_6_figure_supplement_5.jpg]

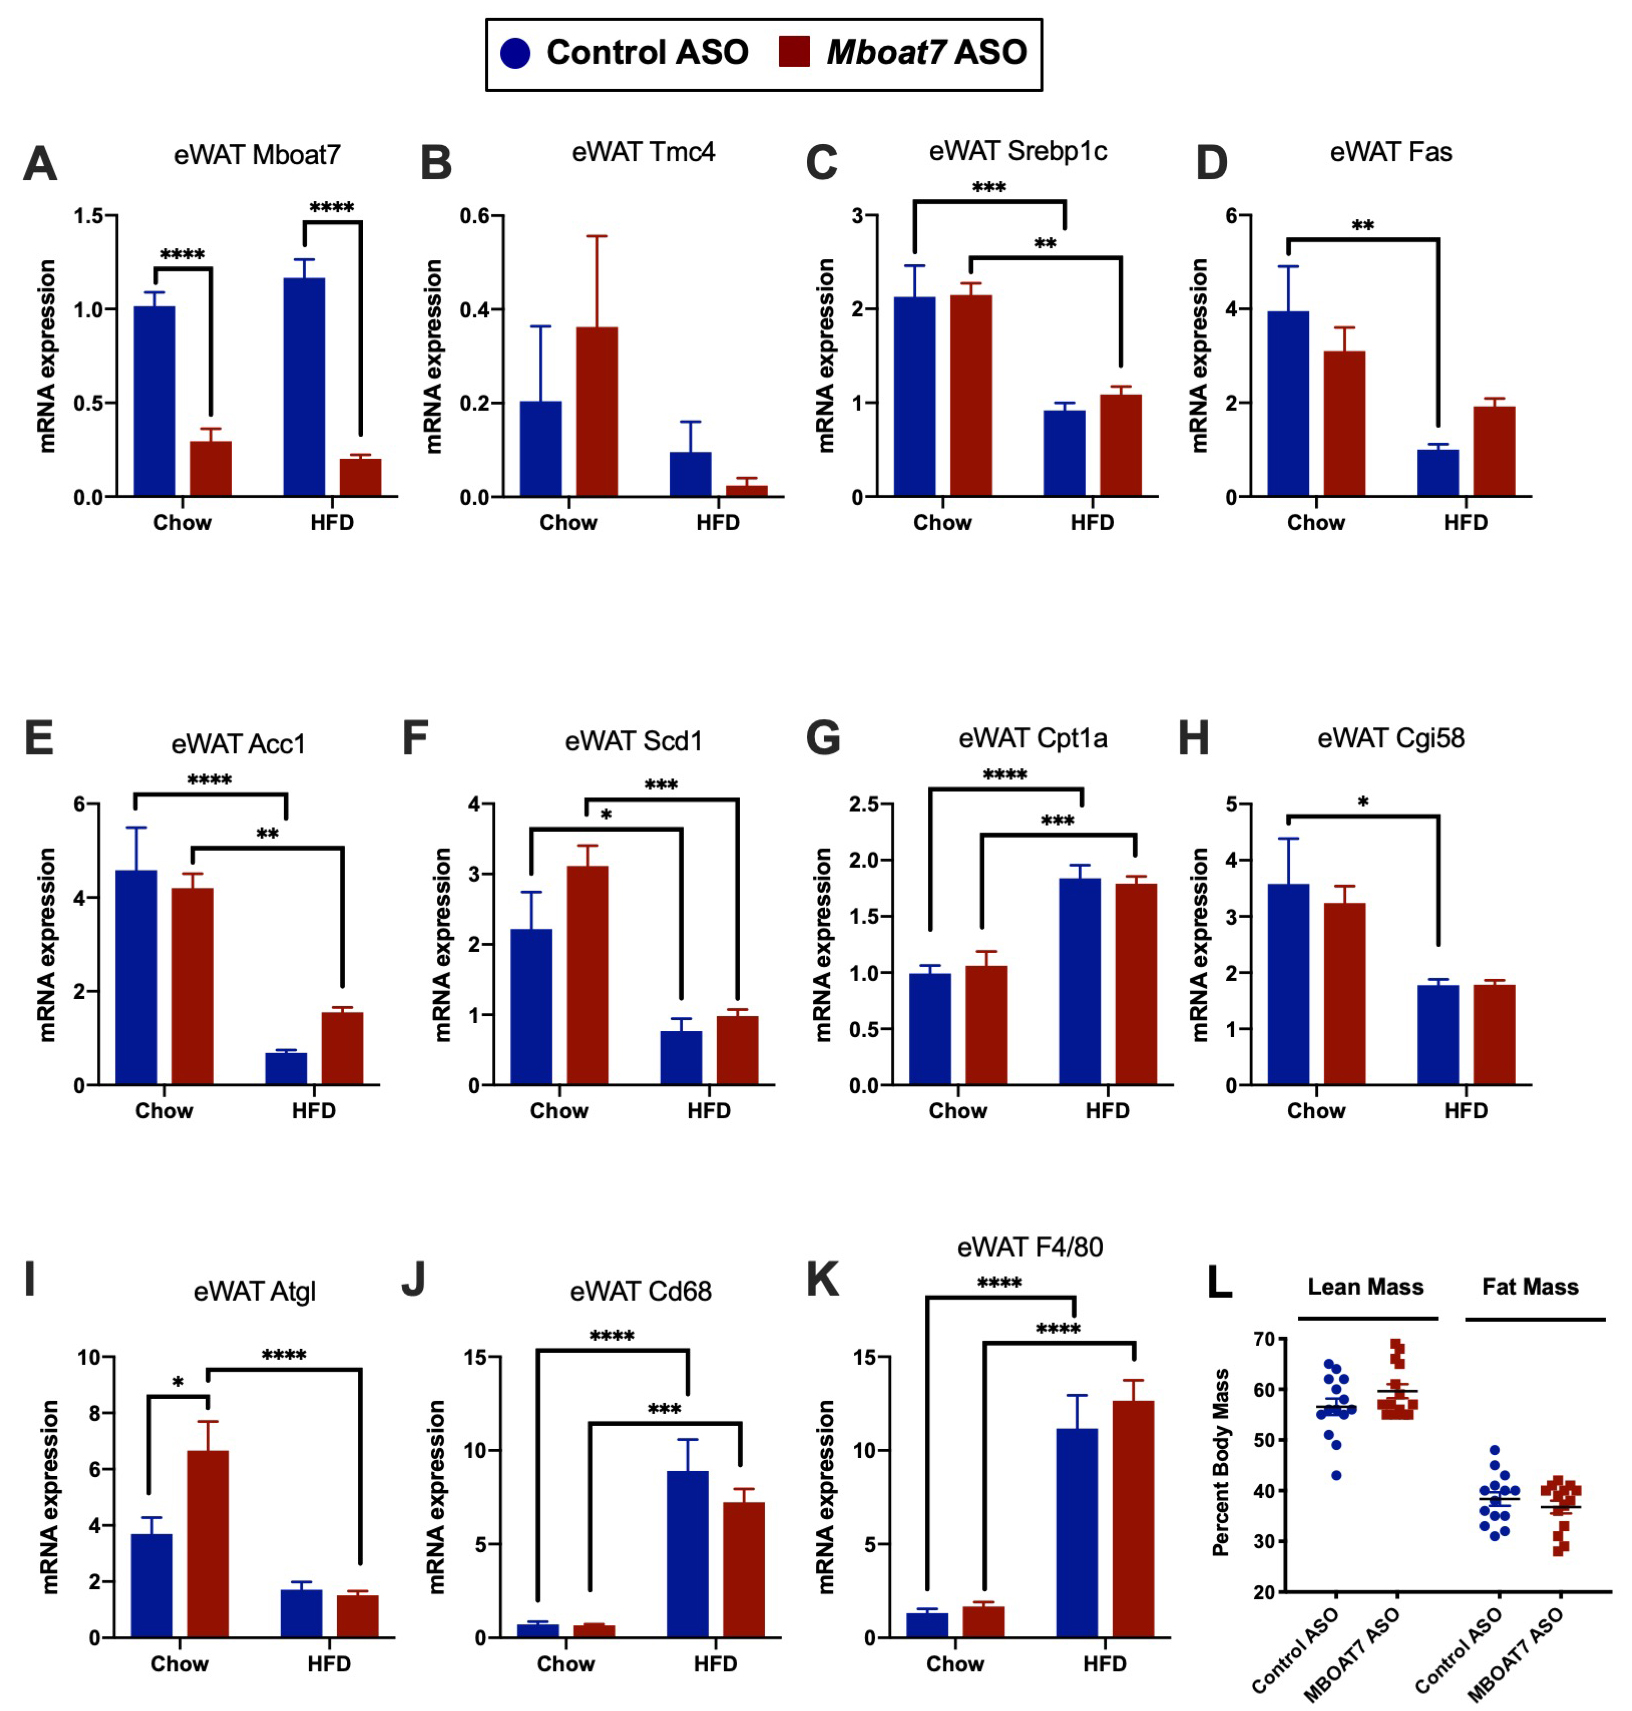

Supplement: supp [file elife-49882-supp-v1.zip › elife_poa_e49882_Figure_2_figure_supplement_1.jpg]

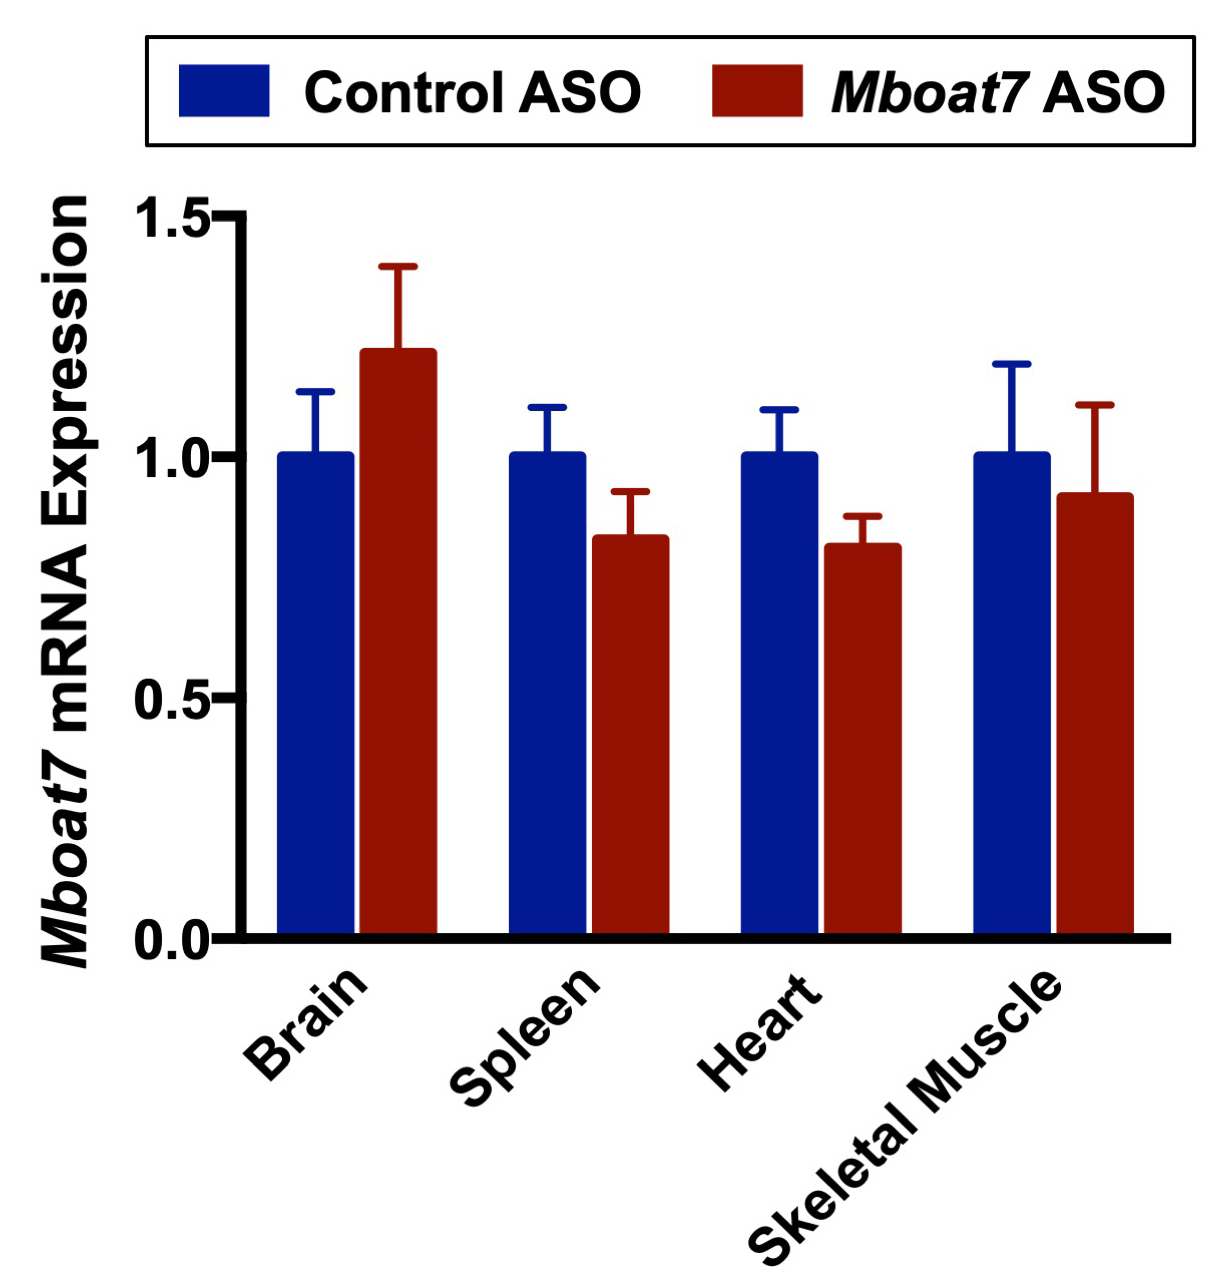

Supplement: supp [file elife-49882-supp-v1.zip › elife_poa_e49882_Figure_2_figure_supplement_2.jpg]

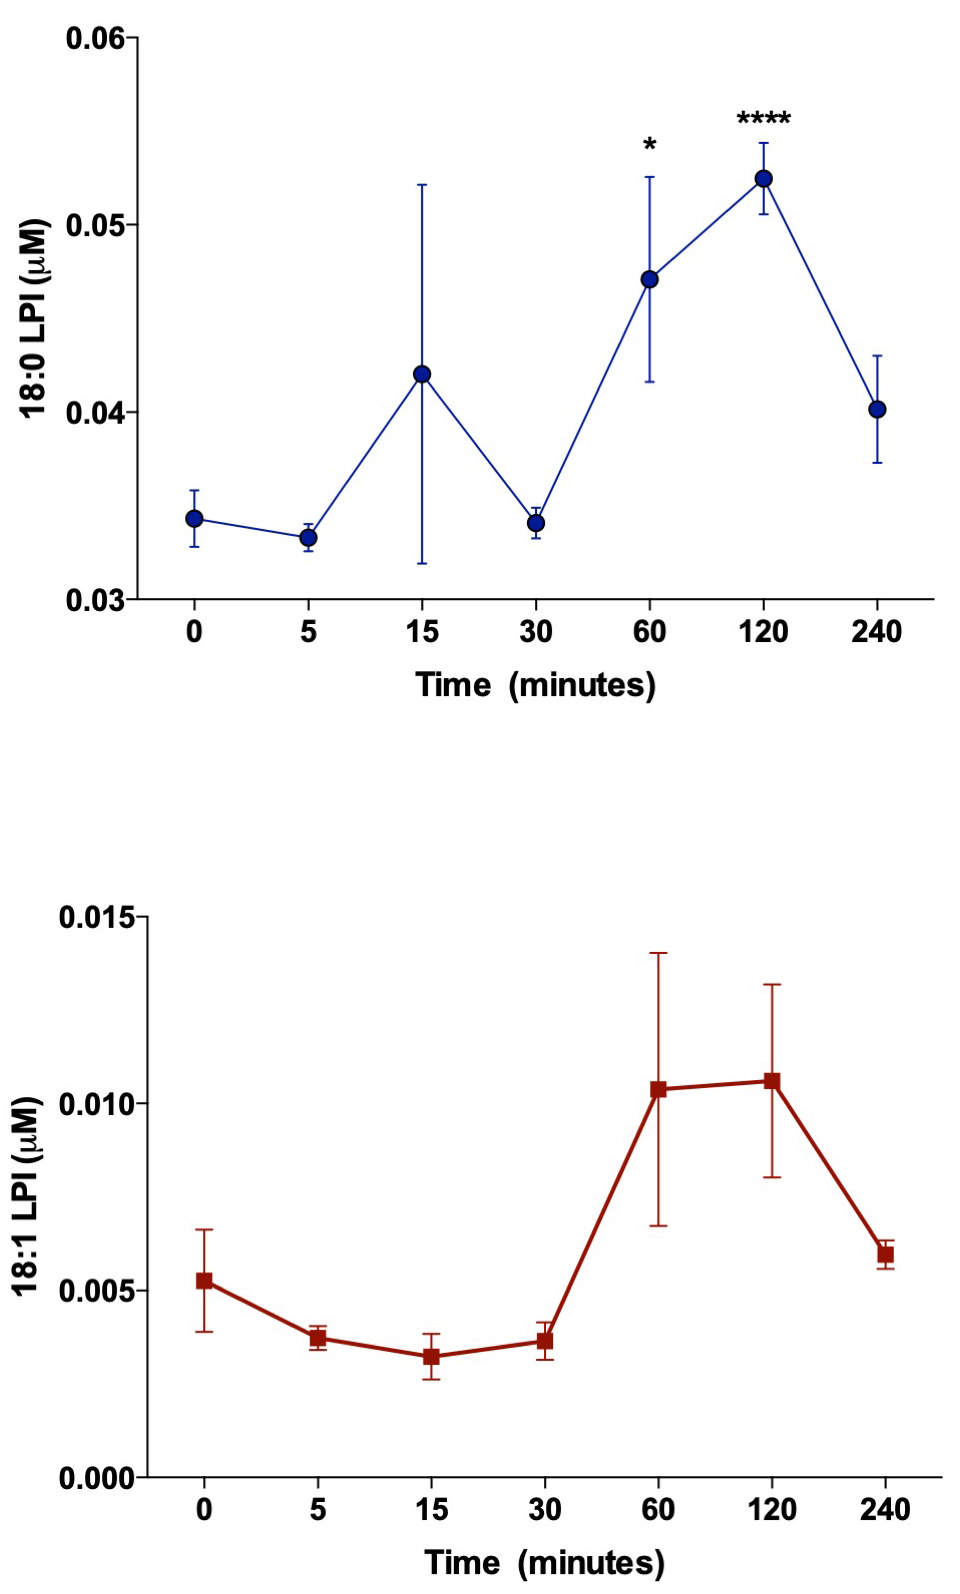

Supplement: supp [file elife-49882-supp-v1.zip › elife_poa_e49882_Figure_7_figure_supplement_1.jpg]

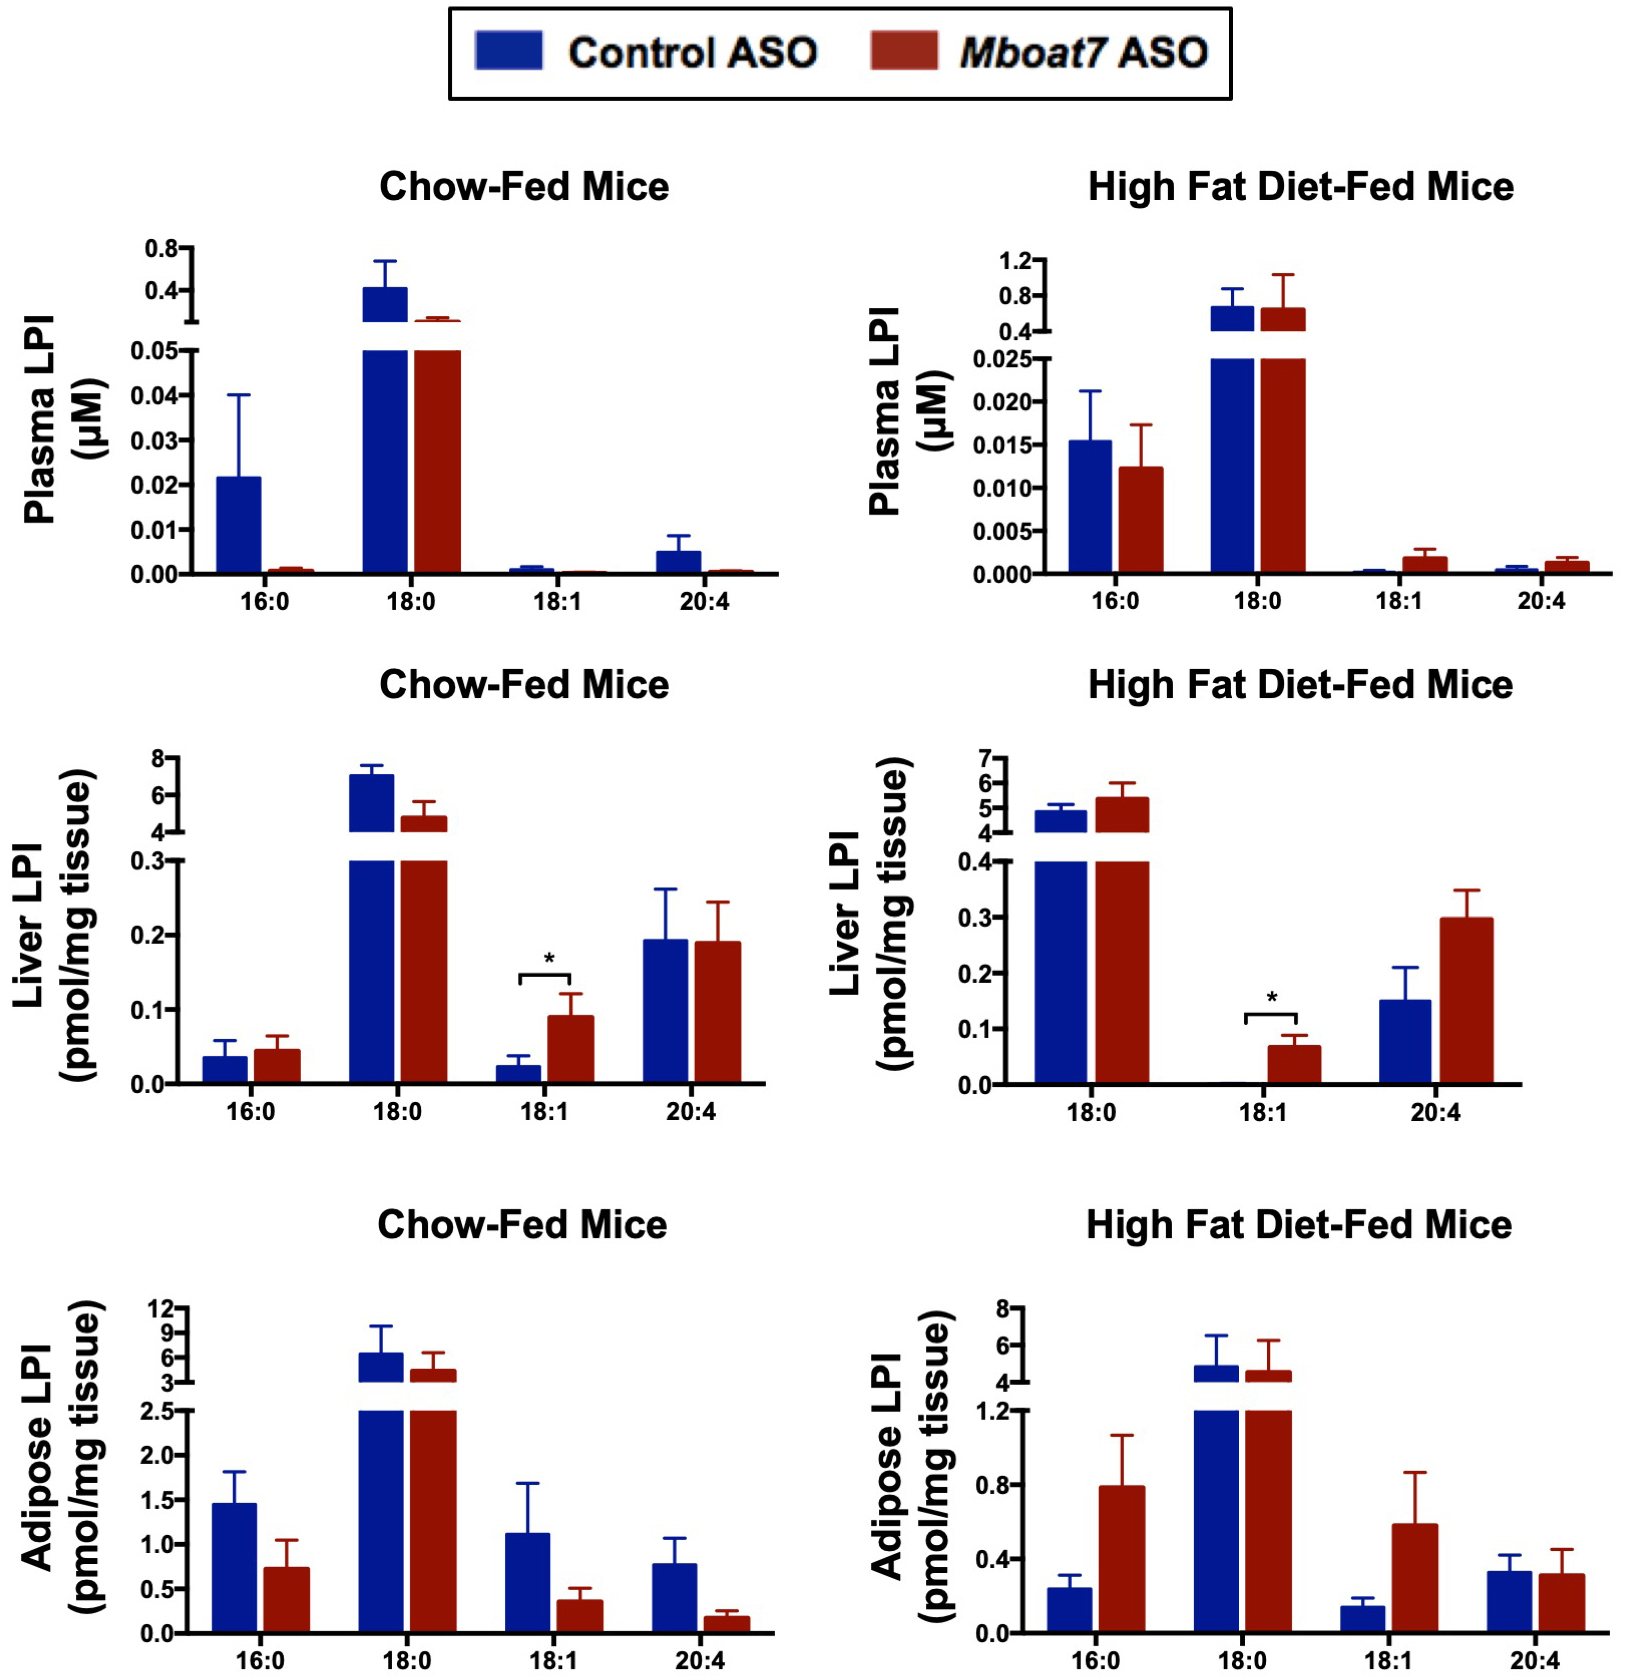

Supplement: supp [file elife-49882-supp-v1.zip › elife_poa_e49882_FIgure_6_figure_supplement_2.jpg]

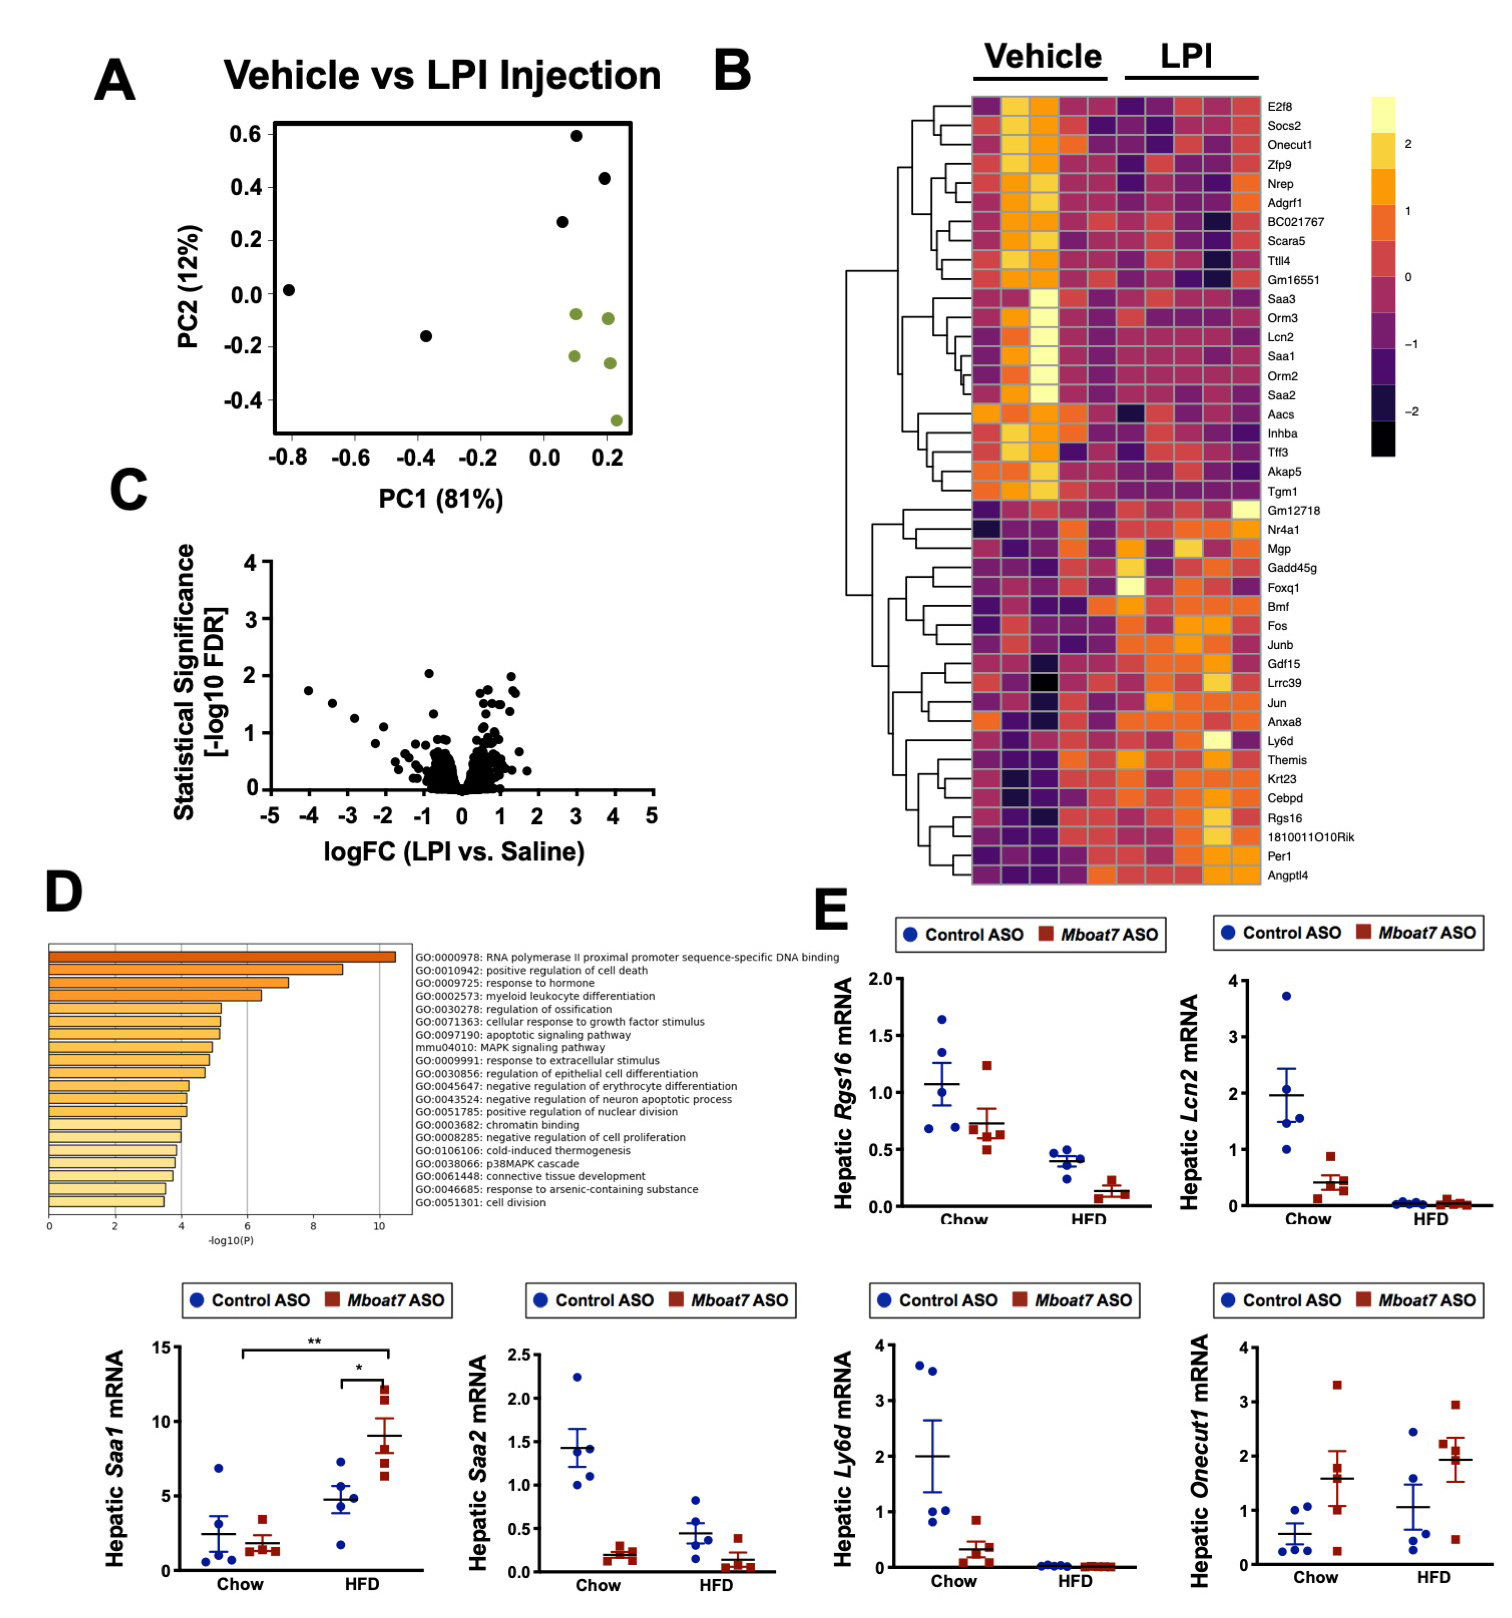

Supplement: supp [file elife-49882-supp-v1.zip › elife_poa_e49882_Figure_8_figure_supplement_2.jpg]

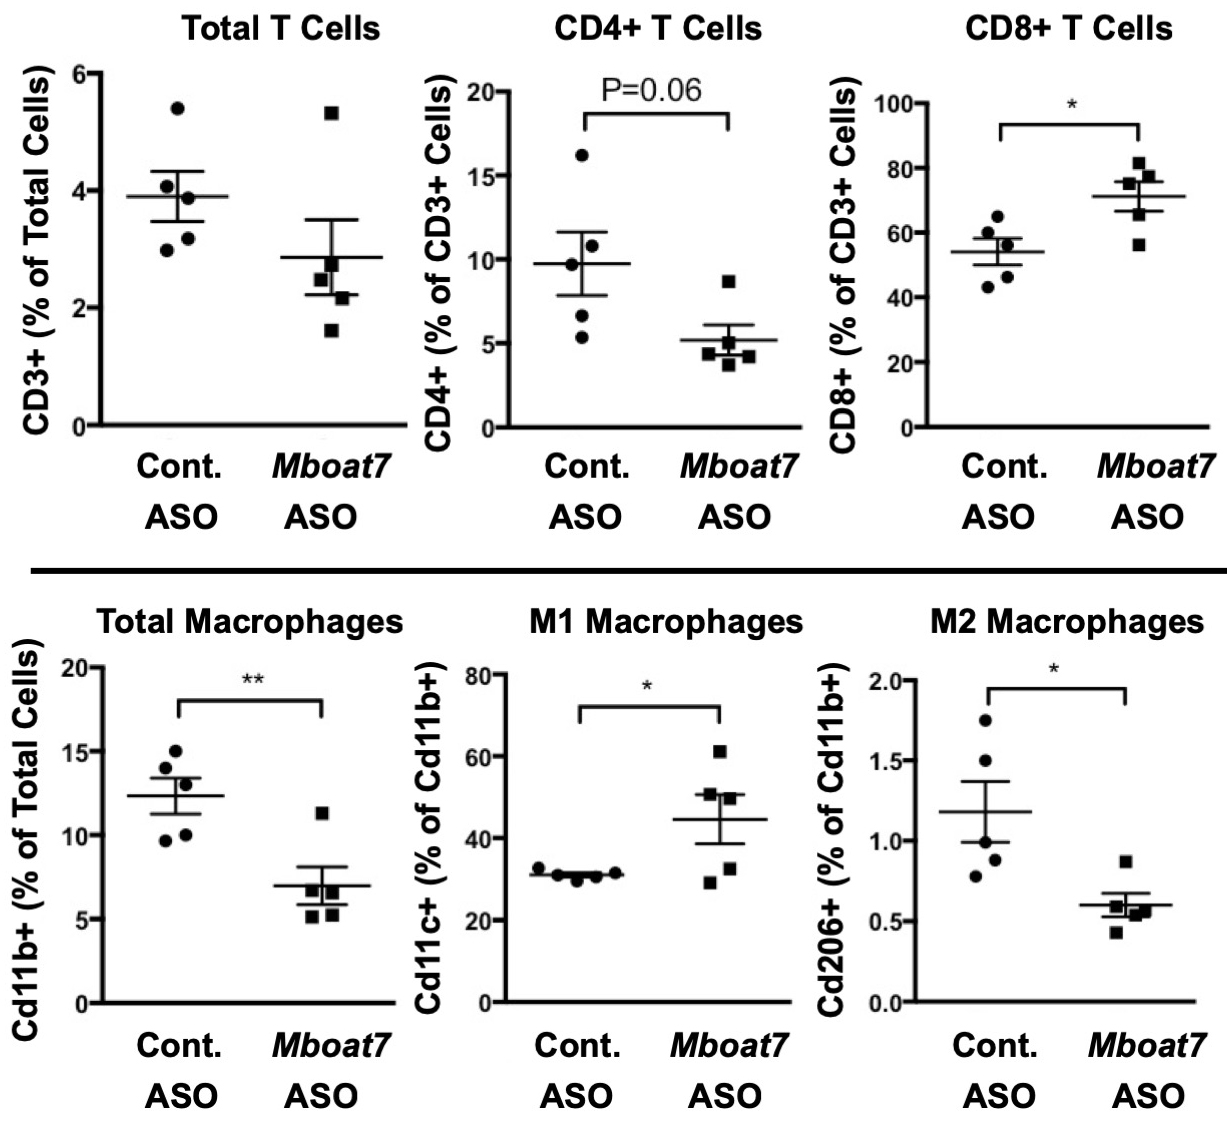

Supplement: supp [file elife-49882-supp-v1.zip › elife_poa_e49882_Figure_3_figure_supplement_1.jpg]

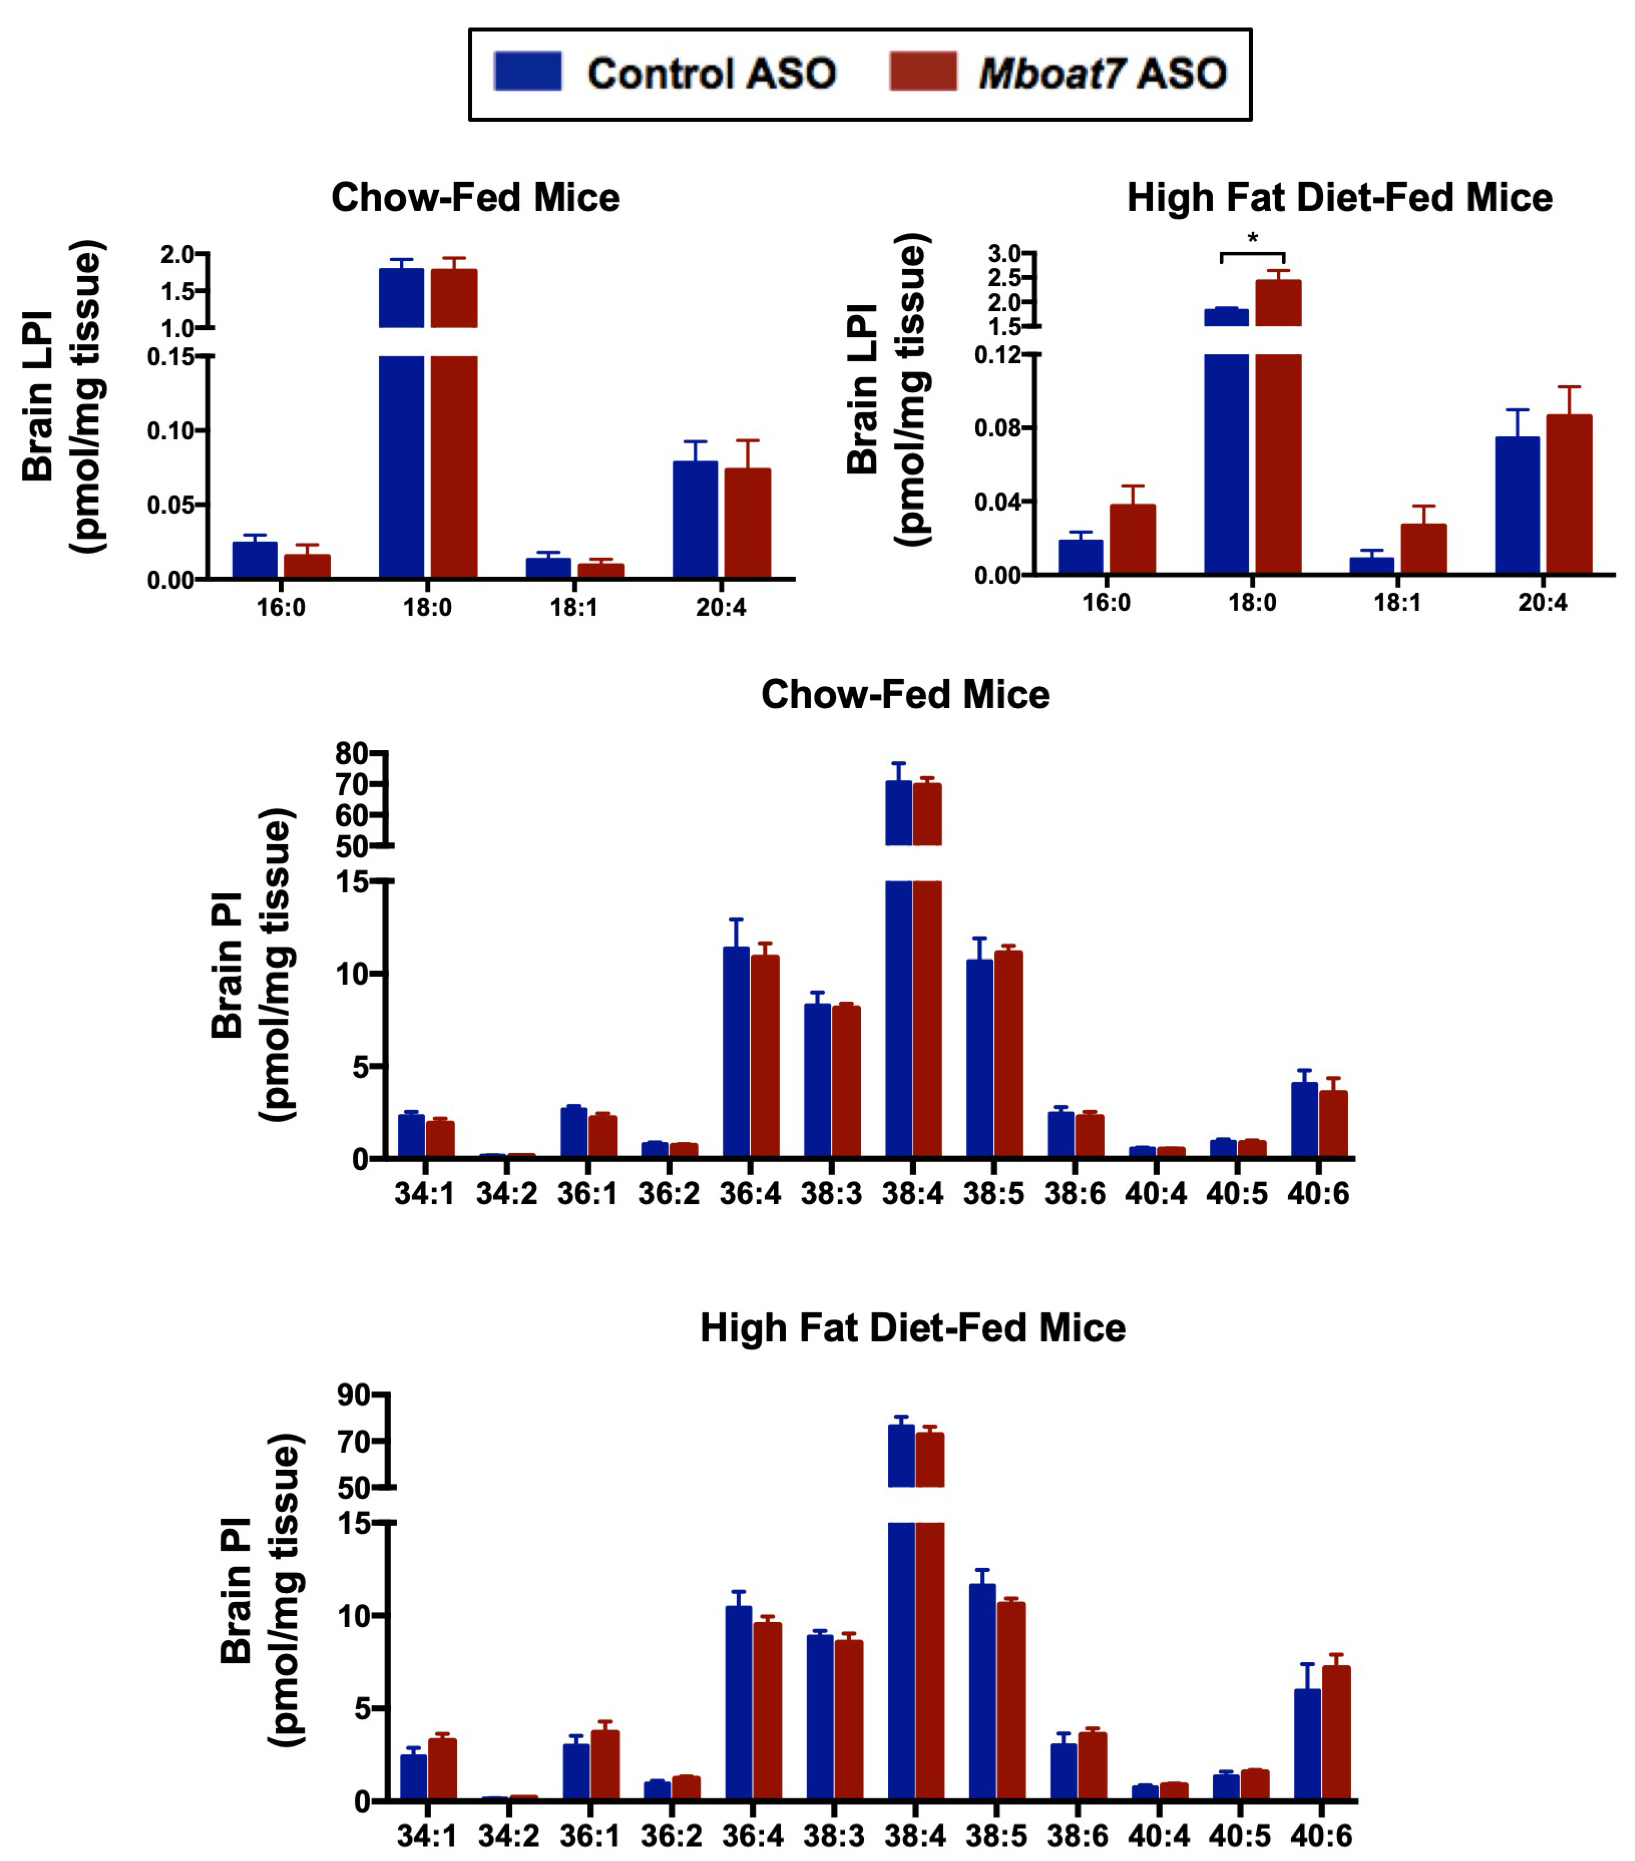

Supplement: supp [file elife-49882-supp-v1.zip › elife_poa_e49882_FIgure_6_figure_supplement_3.jpg]

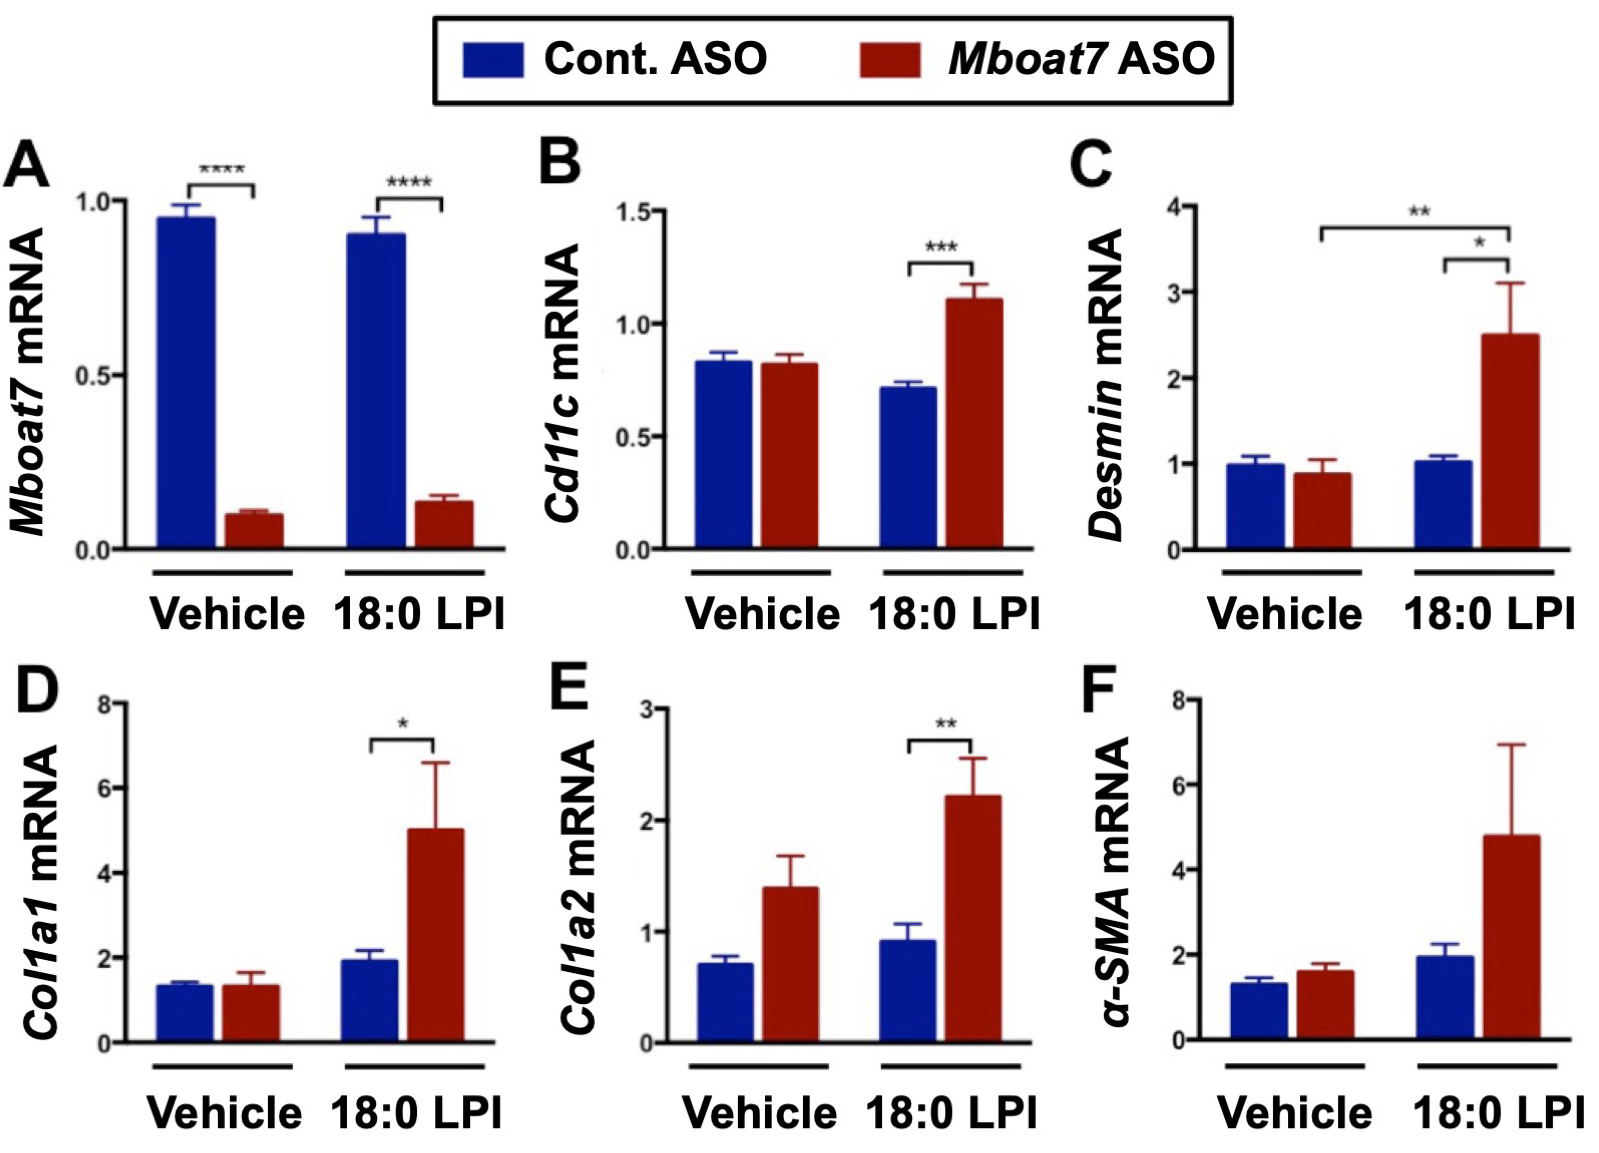

Supplement: supp [file elife-49882-supp-v1.zip › elife_poa_e49882_Figure_8_figure_supplement_1.jpg]

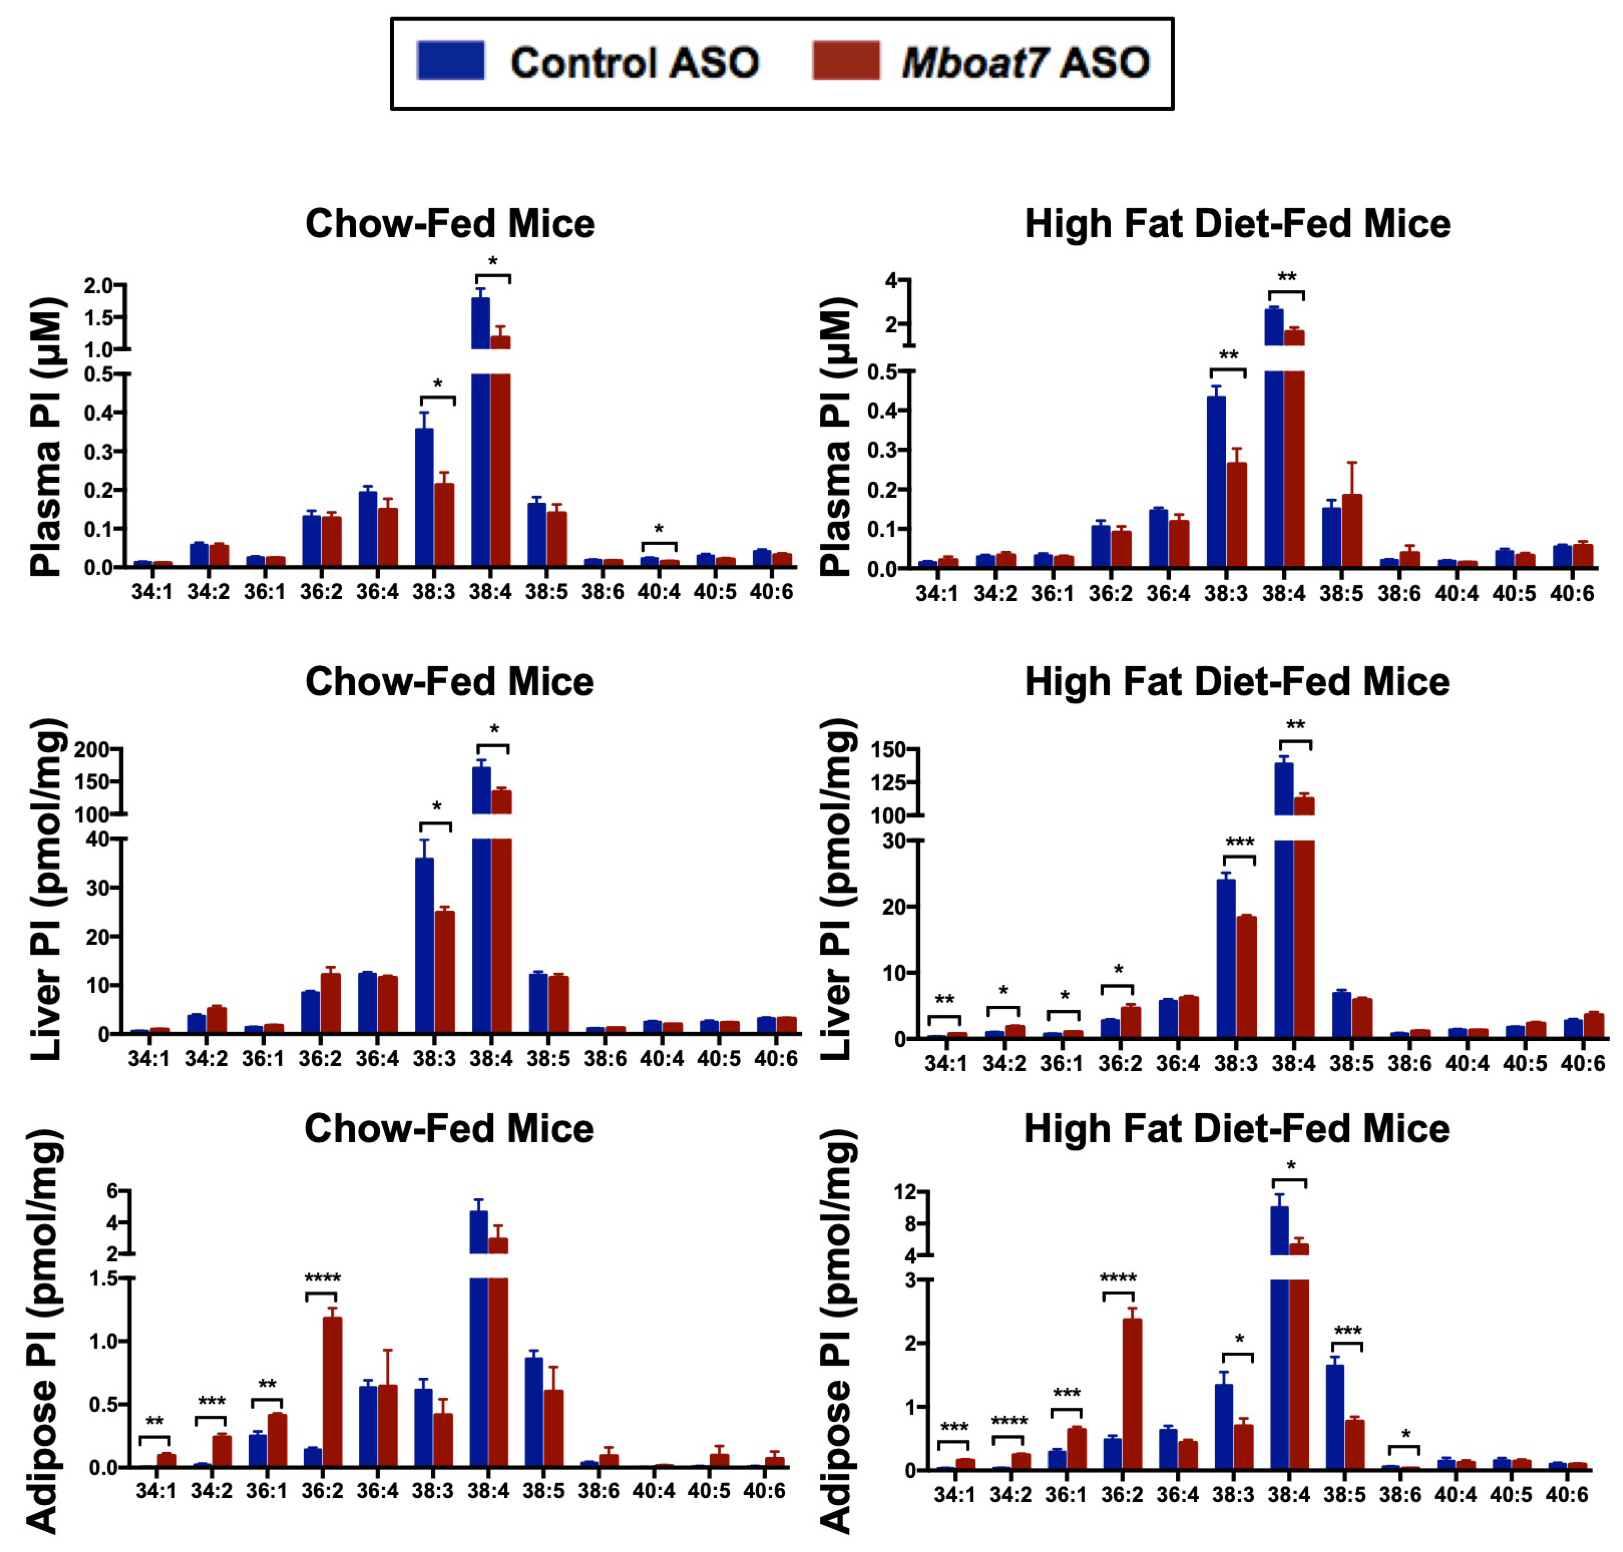

Supplement: supp [file elife-49882-supp-v1.zip › elife_poa_e49882_Figure_6_figure_supplement_1.jpg]
